# Supplementary material for: Insight into catalytic reduction of CO2to methane with silanes using Brookhart's cationic Ir(iii) pincer complex
Source: Royal Society of Chemistry journal article supplement (doi:10.1039/c7ra13486j), 2018-01-01
Supplement: c7ra13486j1.pdf [file c7ra13486j1.pdf]

## Supporting Information

# Insight Into Catalytic Reduction of CO<sub>2</sub> to Methane with Silanes Using Brookhart's Cationic Ir(III) Pincer Complex

Shaoqin Fang, Hongcai Chen, Haiyan Wei\*

Complete reference of 43

**Figure S1.** The optimized geometries of  $\eta^1_{\text{O}}$ -encountered complex **Ir-CO<sub>2</sub>**, the  $\eta^1$ -silane iridium complex **IM2** (The solvent-phase Gibbs energy are given in the bracket), the silylformate iridium intermediate **IM5**, and the intermediate **IM6b**, **TS7b** and the silylformate iridium intermediate **IM7**.

**Figure S2.** The Optimized geometries of **TS6a**, and **TS6ai** (involves dissociation of a second silane Si-H bond to the C=O bond of silylformate in the silylformate intermediate **IM5**, it should be less favorable than **TS6a**, owe to the scenario of more crowding). **IM10-II** (the intermediate from the transition state **TS6ai**). Bond distances are shown in Å. (The solvent-phase Gibbs energy are given in the bracket).

**Figure S3.** The schematic represents of stage I of reducing CO<sub>2</sub> to silylformate (HCOOSiMe<sub>3</sub>) via pathway C (insertion of iridium hydride to the CO<sub>2</sub>) and optimized geometries of key stationary points and transition states (**IM3c**, **IM5c**). The bond distances are shown in Å. The optimized geometries of **IM3c**, **IM5c** in stage I of reducing CO<sub>2</sub> to silylformate (HCOOSiMe<sub>3</sub>) via pathway C. Bond distances are shown in Å. (The solvent-phase Gibbs energy are given in the bracket).

**Figure S4.** The optimized geometries of **IM6c**, **TS7c**, **IM7c**, **IM8c** and **TS9c** in stage II of reducing silylformate to bis(silyl)acetal via pathway C. The bond distances are shown in Å. (The solvent-phase Gibbs energy are given in the bracket).

**Figure S5.** The optimized geometries of **IM8** (Ir-bound formaldehyde adduct) in stage II of hydrosilylation of silylformate to formaldehyde via pathway A. Bond distances are shown in Å. (The solvent-phase Gibbs energy are given in the bracket).

**Figure S6.** The optimized geometries of **IM8bi**, **IM9bi** and **IM10bi** in stage II of hydrosilylation of silylformate to formaldehyde via pathway A. Bond distances are shown in Å. (The solvent-phase Gibbs energy are given in the bracket).

**Figure S7.** Optimized geometries of **IM11b**, **IM12b** and **IM13b** in stage III of reducing bis(silyl)acetal (H<sub>2</sub>C(OSiMe<sub>3</sub>)<sub>2</sub>) to methoxysilane (H<sub>3</sub>COSiMe<sub>3</sub>). Bond distances are shown in Å. (The solvent-phase Gibbs energy are given in the bracket).

**Figure S8.** The Optimized geometries of **TS11bi** in stage III of reducing formaldehyde to methoxysilane. Bond distances are shown in Å. (The solvent-phase Gibbs energy are given in the bracket).

**Figure S9.** Optimized geometries of **IM14b**, **IM15** in stage IV of reducing methoxysilane to methane (CH<sub>4</sub>) under the catalysis of the cation iridium complex. Bond distances are shown in Å. (The solvent-phase Gibbs energy are given in the bracket).

**Figure S10.** The Optimized geometries of **TS8b-syn**, **TS11b-syn**, **TS14b-syn** (corresponding to the silylformate, bis(silyl)acetal, methoxysilane substrates attack the  $\eta^1$ -silane iridium complex from frontside) via pathway B. Bond distances are shown in Å. (The solvent-phase Gibbs energy are given in the bracket).

**Figure S11.** The Optimized geometries of the iridium dihydride (POCOP)IrH<sub>2</sub> and the optimized structures of the intermediates and transition states **TS17**, **IM17**, **TS18**, **IM18**, **IM19**, **TS20** for reducing CO<sub>2</sub> to silylformate (HCOOSiMe<sub>3</sub>) with the iridium dihydride complex [IrH<sub>2</sub>(POCOP)]. The bond distances are shown in Å. (The solvent-phase Gibbs energy are given in the bracket).

**Table S1** Summarize the results from calculations on the reaction of [Ir] with CO<sub>2</sub> and a silane of Me<sub>3</sub>SiH, Hydrosilylation of CO<sub>2</sub> to Silylformate (HCOOSiMe<sub>3</sub>). The gas-phase Gibbs free energies ( $\Delta G$ ) are in kcal/mol.

**Table S2** Comparison of the key structures with X-ray single crystal structure of complex with a triethylsilane end-on coordinated to the iridium center as reported by Brookhart and an  $\eta^1$ -silane iridium complex **IM2**.

**Table S3** Comparison of the energy barriers of the rate-determining steps of stage I calculated at B3LYP, B3LYP-D and M06 level in the solvent. The solvent-phase Gibbs free energies ( $\Delta G$ ) are in kcal/mol.

**Table S4** Cartesian coordinates for all optimized structures in XYZ format.

### Complete reference of 43

Frisch, M. J. et al. *Gaussian 09*; Gaussian, Inc. Frisch, M. J.; Trucks, G. W.; Schlegel, H. B.; Scuseria, G. E.; Robb, M. A.; Cheeseman, J. R.; Montgomery, Jr., J. A.; Vreven, T.; Kudin, K. N.; Burant, J. C.; Millam, J. M.; Iyengar, S. S.; Tomasi, J.; Barone, V.; Mennucci, B.; Cossi, M.; Scalmani, G.; Rega, N.; Petersson, G. A.; Nakatsuji, H.; Hada, M.; Ehara, M.; Toyota, K.; Fukuda, R.; Hasegawa, J.; Ishida, M.; Nakajima, T.; Honda, Y.; Kitao, O.; Nakai, H.; Klene, M.; Li, X.; Knox, J. E.; Hratchian, H. P.; Cross, J. B.; Bakken, V.; Adamo, C.; Jaramillo, J.; Gomperts, R.; Stratmann, R. E.; Yazyev, O.; Austin, A. J.; Cammi, R.; Pomelli, C.; Ochterski, J. W.; Ayala, P. Y.; Morokuma, K.; Voth, G. A.; Salvador, P.; Dannenberg, J. J.; Zakrzewski, V. G.; Dapprich, S.; Daniels, A. D.; Strain, M. C.; Farkas, O.; Malick, D. K.; Rabuck, A. D.; Raghavachari, K.; Foresman, J. B.; Ortiz, J. V.; Cui, Q.; Baboul, A. G.; Clifford, S.; Cioslowski, J.; Stefanov, B. B.; Liu, G.; Liashenko, A.; Piskorz, P.; Komaromi, I.; Martin, R. L.; Fox, D. J.; Keith, T.; Al-Laham, M. A.; Peng, C. Y.; Nanayakkara, A.; Challacombe, M.; Gill, P. M. W.; Johnson, B.; Chen, W.; Wong, M. W.; Gonzalez, C.; and Pople, J. A.; Gaussian, Inc., Pittsburgh PA., 2009.

**Figure S1.** The optimized geometries of  $\eta^1_{\text{O}}$ -encountered complex **Ir-CO<sub>2</sub>** and the  $\eta^1$ -silane iridium complex **IM2** (The solvent-phase Gibbs energy are given in the bracket), the silylformate iridium intermediate **IM5**, and the intermediat **IM6b**, **TS7b** and the silylformate iridium intermediate **IM7**.

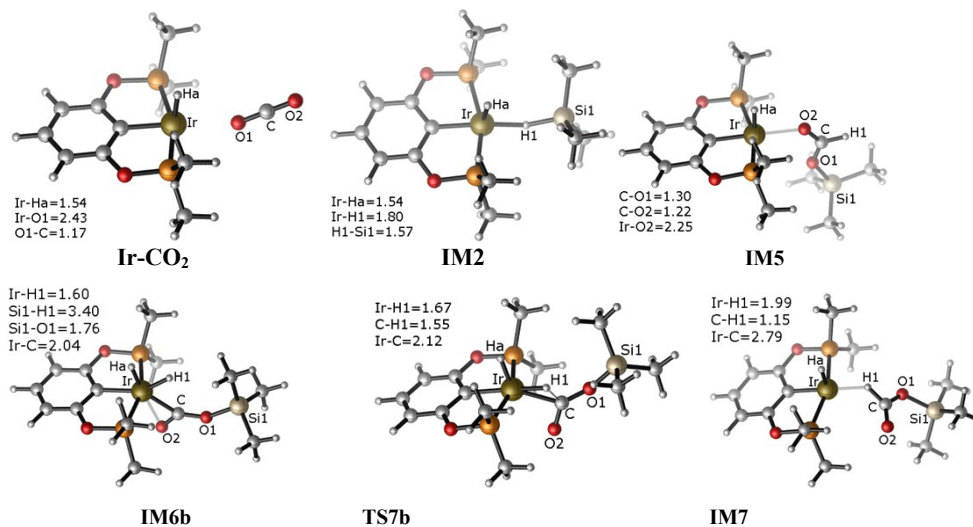

**Figure S2.** The Optimized geometries of **TS6a**, and **TS6ai** (involves dissociation of a second silane Si-H bond to the C=O bond of silylformate in the silylformate intermediate **IM5**, it should be less favorable than **TS6a**, owe to the scenario of more crowding). **IM10-II** (the intermediate from the transition state **TS6ai**). Bond distances are shown in Å. (The solvent-phase Gibbs energy are given in the bracket).

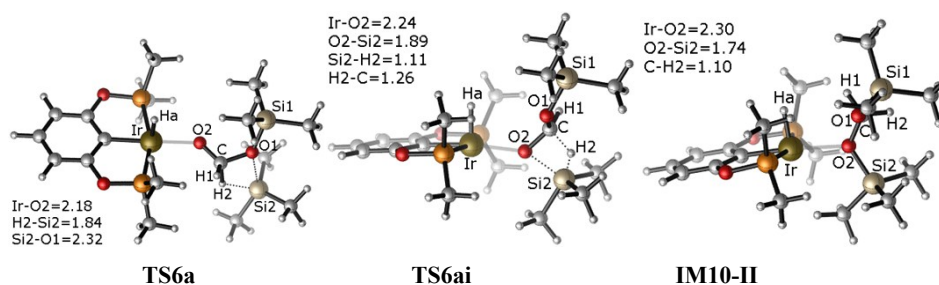

**Figure S3.** The schematic represents of stage I of reducing CO<sub>2</sub> to silylformate (HCOOSiMe<sub>3</sub>) via pathway C (insertion of iridium hydride to the CO<sub>2</sub>) and optimized geometries of key stationary points and transition states (**IM3c**, **IM5c**). The bond distances are shown in Å. The optimized geometries of **IM3c**, **IM5c** in stage I of reducing CO<sub>2</sub> to silylformate (HCOOSiMe<sub>3</sub>) via pathway C. Bond distances are shown in Å. (The solvent-phase Gibbs energy are given in the bracket).

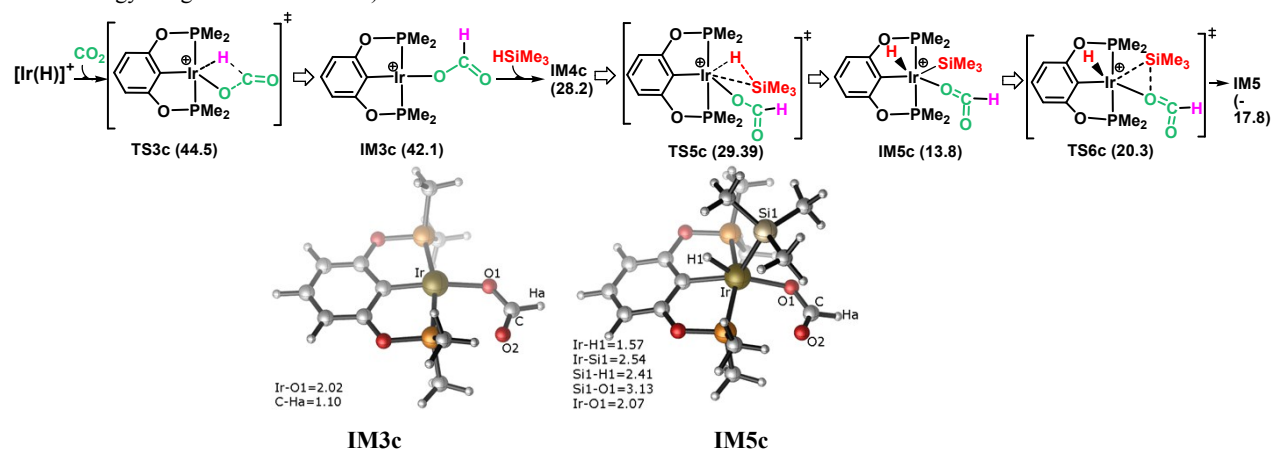

**Figure S4.** The Optimized Geometries of **IM6c**, **TS7c**, **IM7c**, **IM8c**, and **TS9c** in stage II of reducing silylformate to bis(silyl)acetal via pathway C. The bond distances are shown in Å. (The solvent-phase Gibbs energy are given in the bracket).

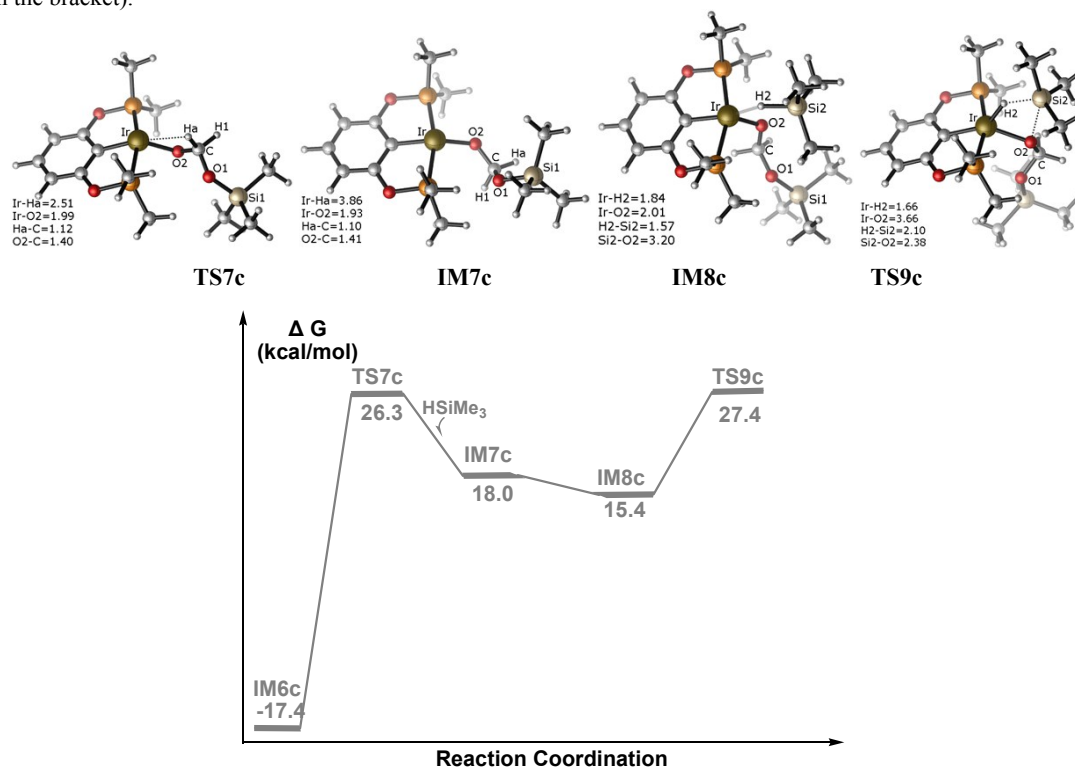

**Figure S5.** The optimized geometries of **IM8** (Ir-bound formaldehyde adduct) in stage II of hydrosilylation of silylformate to formaldehyde via pathway A. Bond distances are shown in Å. (The solvent-phase Gibbs energy are given in the bracket).

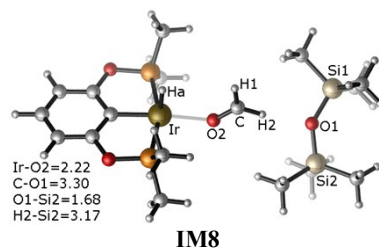

**Figure S6.** The optimized geometries of **IM8bi**, **IM9bi** and **IM10bi** in stage II of hydrosilylation of silylformate to formaldehyde via pathway A. Bond distances are shown in Å. (The solvent-phase Gibbs energy are given in the bracket).

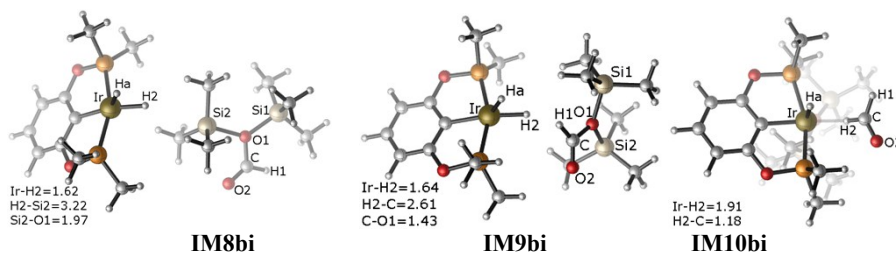

**Figure S7.** Optimized geometries of **IM11b**, **IM12b** and **IM13b** in stage III of reducing bis(silyl)acetal ( $\text{H}_2\text{C}(\text{OSiMe}_3)_2$ ) to methoxysilane ( $\text{H}_3\text{COSiMe}_3$ ). Bond distances are shown in Å. (The solvent-phase Gibbs energy are given in the bracket).

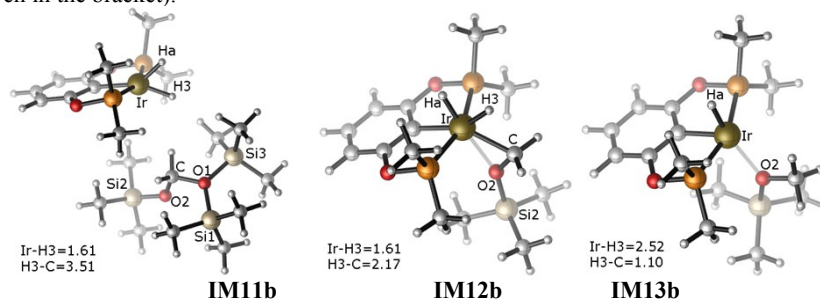

**Figure S8.** The Optimized geometries of **TS11bi** in stage III of reducing formaldehyde to methoxysilane. Bond distances are shown in Å. (The solvent-phase Gibbs energy are given in the bracket).

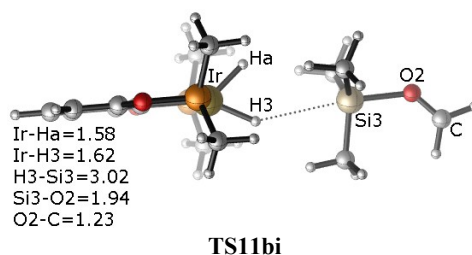

**Figure S9.** Optimized geometries of **IM14b**, **IM15** in stage IV of reducing methoxysilane to methane ( $\text{CH}_4$ ) under the catalysis of the cation iridium complex. Bond distances are shown in Å. (The solvent-phase Gibbs energy are given in the bracket).

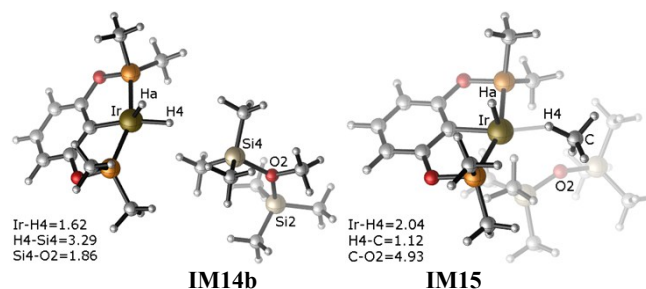

**Figure S10.** The Optimized geometries of **TS8b-syn**, **TS11b-syn**, **TS14b-syn** (corresponding to the silylformate, bis(silyl)acetal, methoxysilane substrates attack the  $\eta^1$ -silane iridium complex from frontside) via pathway B. Bond distances are shown in Å. (The solvent-phase Gibbs energy are given in the bracket).

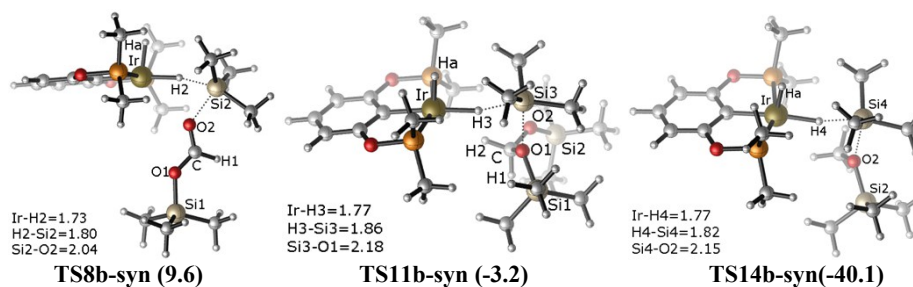

**Figure S11.** The Optimized geometries of the iridium dihydride (POCOP)IrH<sub>2</sub> and the optimized structures of the intermediates and transition states **TS17**, **IM17**, **TS18**, **IM18**, **IM19**, **TS20** for reducing CO<sub>2</sub> to silylformate (HCOOSiMe<sub>3</sub>) with the iridium dihydride complex [IrH<sub>2</sub>(POCOP)]. The bond distances are shown in Å. (The solvent-phase Gibbs energy are given in the bracket).

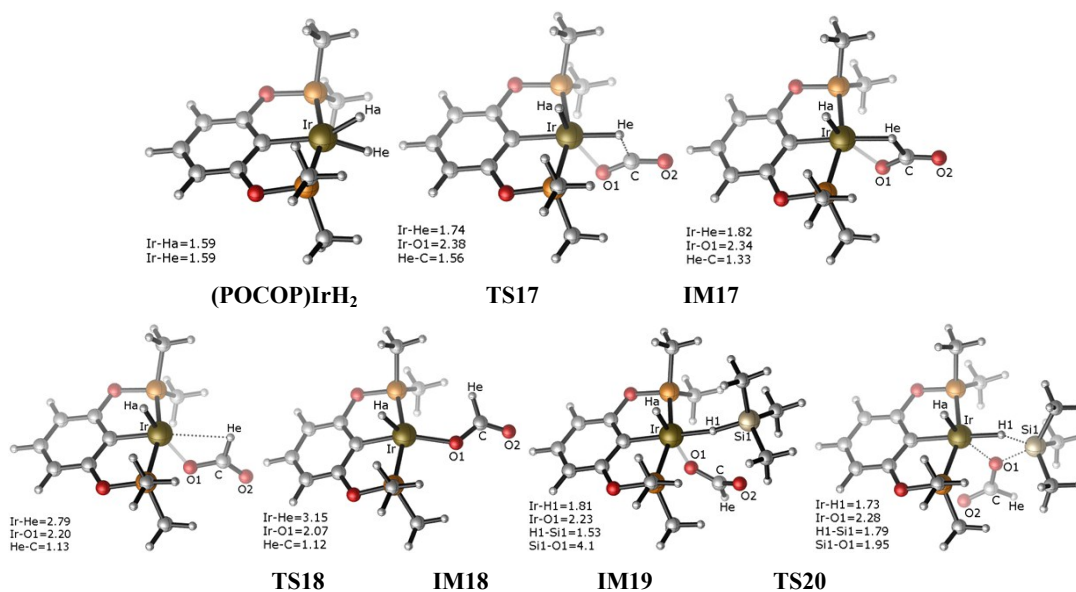

**Table S1** Summarizes the results from calculations on the reaction of [Ir] with CO<sub>2</sub> and a silane of Me<sub>3</sub>SiH, Hydrosilylation of CO<sub>2</sub> to Silylformate (HCOOSiMe<sub>3</sub>). The gas-phase Gibbs free energies (ΔG) are in kcal/mol.

| pathwayA                    | Ir-CO <sub>2</sub> | TS4a | IM4   | TS5a  | IM5   |      |
|-----------------------------|--------------------|------|-------|-------|-------|------|
| B3LYP/6-311Gdp<br>Gas-phase | -3.4               | 22.0 | -19.4 | -15.5 | -26.7 |      |
| pathwayB                    | IM2                | TS4b | IM6b  | TS7b  | IM7   |      |
| B3LYP/6-311Gdp<br>Gas-phase | -19.0              | 23.6 | -8.0  | -4.6  | -12.1 |      |
| pathwayC                    | TS3c               | IM3c | IM4c  | TS5c  | IM5c  | TS6c |
| B3LYP/6-311Gdp<br>Gas-phase | 44.4               | 25.5 | 14.2  | 16.0  | 0.3   | 9.8  |

**Table S2** Comparison of the key structures with X-ray single crystal structure of complex with a triethylsilane end-on coordinated to the iridium center as reported by Brookhart and an η<sup>1</sup>-silane iridium complex **IM2**.

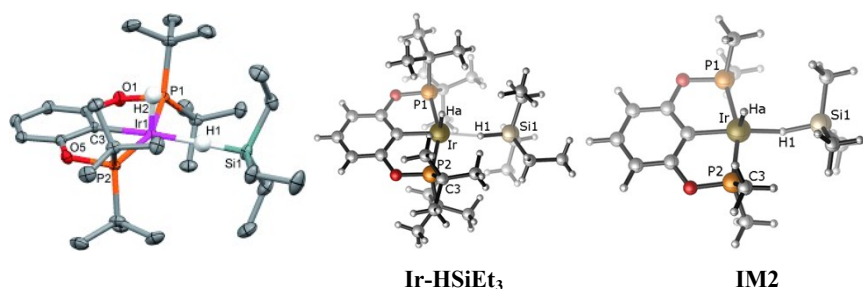

| Distances/angles | Ir-Ha | Ir-H1 | H1-Si1 | Ir-Si1 | Ir-P1 | Ir-P2 | Ir-C3 | Ir-H1-Si1 | P2-Ir-P1 |
|------------------|-------|-------|--------|--------|-------|-------|-------|-----------|----------|
|------------------|-------|-------|--------|--------|-------|-------|-------|-----------|----------|

|                             |      |      |      |      |      |      |      |     |     |
|-----------------------------|------|------|------|------|------|------|------|-----|-----|
| <b>Ir-HSiEt<sub>3</sub></b> | 1.43 | 1.94 | 1.48 | 3.35 | 2.35 | 2.31 | 2.02 | 157 | 158 |
| <b>M2</b>                   | 1.54 | 1.80 | 1.57 | 3.27 | 2.34 | 2.34 | 3.63 | 152 | 160 |

**Table S3** Comparison of the energy barriers of the rate-determining steps of stage I calculated at B3LYP, B3LYP-D and M06 level in the solvent. The solvent-phase Gibbs free energies ( $\Delta G$ ) are in kcal/mol. (The correction according to Martin is not included here)

|                | <b>TS3a</b> | <b>TS4a</b> | <b>TS3b</b> | <b>TS4b</b> | <b>TS5b</b> |
|----------------|-------------|-------------|-------------|-------------|-------------|
| <b>B3LYP</b>   | 48.1        | 49.8        | 52.5        | 55.4        | 57.7        |
| <b>B3LYP-D</b> | 39.2        | 38.1        | 42.5        | 41.6        | 42.4        |
| <b>M06</b>     | 42.6        | 44.2        | 45.2        | 47.1        | 47.7        |

**Table S4** Cartesian coordinates for all optimized structures in XYZ format.

|               |                                      |           |           |           |           |           |           |
|---------------|--------------------------------------|-----------|-----------|-----------|-----------|-----------|-----------|
| <b>1Ir</b>    | [(POCOP)Ir(H)(acetone)] <sup>+</sup> |           |           | P         | 2.384814  | 5.488102  | -0.145739 |
|               |                                      |           |           | C         | 3.403757  | 6.028709  | 1.260223  |
| <b>1Ir</b>    |                                      |           |           | O         | -2.318146 | 3.783092  | 0.019020  |
| C             | -0.038714                            | 3.883762  | -0.017258 | C         | 3.366624  | 5.873404  | -1.631902 |
| C             | 1.184740                             | 3.213649  | -0.009796 | C         | -3.283533 | 5.807371  | -1.522080 |
| C             | 1.260852                             | 1.821033  | 0.018055  | H         | -2.808111 | 5.417943  | -2.423363 |
| C             | 0.082414                             | 1.090815  | 0.035683  | H         | -4.266630 | 5.345839  | -1.407392 |
| C             | -1.170698                            | 1.729910  | 0.004262  | H         | -2.707440 | 5.685268  | 2.286622  |
| C             | -1.206399                            | 3.136477  | 0.000662  | H         | -4.207134 | 5.480132  | 1.348411  |
| O             | 0.142418                             | -0.288632 | 0.093554  | H         | -3.361485 | 7.047035  | 1.350984  |
| P             | -1.311477                            | -1.102462 | 0.047755  | H         | -3.401931 | 6.888646  | -1.625188 |
| C             | -1.106691                            | -2.205005 | -1.386312 | H         | 4.361958  | 5.431549  | -1.549925 |
| Ir            | -2.834438                            | 0.680980  | -0.038726 | H         | 2.869445  | 5.474154  | -2.517005 |
| P             | -3.786458                            | 2.825937  | -0.019498 | H         | 3.460010  | 6.956767  | -1.738686 |
| C             | -4.670182                            | 3.451125  | -1.483145 | H         | 4.390973  | 5.565162  | 1.206417  |
| O             | -2.425397                            | 3.787118  | 0.023778  | H         | 2.919454  | 5.741470  | 2.193784  |
| C             | -4.740216                            | 3.400696  | 1.415610  | H         | 3.515543  | 7.115325  | 1.237305  |
| C             | -1.227166                            | -2.175372 | 1.511072  | H         | 0.088028  | 6.048306  | 1.368209  |
| H             | -1.041493                            | -1.615434 | -2.301722 | H         | 2.275460  | 1.229184  | -0.038928 |
| H             | -0.197710                            | -2.800163 | -1.275603 | H         | 0.126157  | -0.027588 | 0.007823  |
| H             | -1.231373                            | -1.563421 | 2.413336  | H         | -2.048120 | 1.186125  | 0.032251  |
| H             | -0.317246                            | -2.778319 | 1.483592  | O         | 0.036353  | 8.241009  | -0.441760 |
| H             | -2.097854                            | -2.835467 | 1.527068  | C         | 0.032391  | 9.324709  | -0.001484 |
| H             | -1.968998                            | -2.872571 | -1.457162 | O         | 0.028261  | 10.395181 | 0.419127  |
| H             | -4.816090                            | 4.530335  | -1.401100 |           |           |           |           |
| H             | -4.096205                            | 3.233142  | -2.384729 | <b>M2</b> |           |           |           |
| H             | -5.643484                            | 2.959737  | -1.557011 | C         | -1.243020 | 3.077732  | 0.140495  |
| H             | -4.890610                            | 4.480727  | 1.359318  | C         | -0.089129 | 3.846009  | 0.178087  |
| H             | -4.204092                            | 3.155010  | 2.332557  | C         | 1.143317  | 3.194961  | 0.121225  |
| H             | -5.711742                            | 2.900656  | 1.428866  | C         | 1.234083  | 1.805880  | 0.030507  |
| H             | -3.100376                            | 0.539347  | 1.474970  | C         | 0.059615  | 1.069305  | -0.004853 |
| H             | -0.094030                            | 4.964399  | -0.029975 | C         | -1.207949 | 1.676307  | 0.033187  |
| H             | 2.101130                             | 3.790791  | -0.021694 | O         | 0.137468  | -0.311690 | -0.073529 |
| H             | 2.211703                             | 1.304636  | 0.032680  | P         | -1.310953 | -1.129687 | -0.163038 |
|               |                                      |           |           | C         | -1.163257 | -2.309565 | 1.214833  |
| <b>Ir-CO2</b> |                                      |           |           | Ir        | -2.893972 | 0.592759  | -0.102713 |
| C             | -1.107650                            | 3.109461  | -0.021045 | P         | -3.815707 | 2.731646  | 0.124668  |
| C             | 0.086211                             | 3.851039  | -0.072528 | C         | -4.726823 | 3.196931  | 1.629988  |
| C             | 1.295639                             | 3.133397  | -0.060608 | O         | -2.471929 | 3.711741  | 0.217413  |
| C             | 1.325642                             | 1.747508  | -0.039280 | C         | -1.083438 | -2.127271 | -1.672712 |
| C             | 0.115068                             | 1.055273  | -0.010503 | C         | -4.739851 | 3.495595  | -1.249484 |
| C             | -1.109336                            | 1.723257  | 0.000809  | H         | -1.054093 | -1.474079 | -2.545817 |
| Ir            | 0.065082                             | 5.828148  | -0.157421 | H         | -0.147996 | -2.687461 | -1.612803 |
| P             | -2.245598                            | 5.441990  | -0.069413 | H         | -1.191641 | -1.767344 | 2.160304  |
| C             | -3.227881                            | 5.962798  | 1.369721  | H         | -0.218085 | -2.850813 | 1.137484  |
| O             | 2.493135                             | 3.830988  | -0.060163 | H         | -1.990857 | -3.020605 | 1.186637  |

|             |           |           |           |             |           |           |           |
|-------------|-----------|-----------|-----------|-------------|-----------|-----------|-----------|
| H           | -1.916589 | -2.825169 | -1.781709 | H           | -1.716406 | 11.680859 | -4.640097 |
| H           | -4.859143 | 4.566092  | -1.069896 | H           | -1.862517 | 9.971114  | -5.057120 |
| H           | -4.199082 | 3.347779  | -2.185193 | H           | -2.696364 | 10.618579 | -3.626008 |
| H           | -5.724923 | 3.031185  | -1.333900 | H           | 1.429219  | 11.015076 | -4.835565 |
| H           | -4.846440 | 4.281542  | 1.669328  | H           | 2.169129  | 10.023583 | -3.553417 |
| H           | -4.170343 | 2.863656  | 2.506363  | H           | 1.215417  | 9.266370  | -4.845892 |
| H           | -5.710160 | 2.723376  | 1.632076  | H           | -0.324609 | 12.390084 | -1.830324 |
| H           | -3.107741 | 0.340482  | 1.402863  | H           | -1.050311 | 11.043417 | -0.955786 |
| H           | -0.157829 | 4.923148  | 0.254387  | H           | 0.717254  | 11.164382 | -1.063041 |
| H           | 2.052763  | 3.782725  | 0.150461  |             |           |           |           |
| H           | 2.190849  | 1.301979  | -0.007519 |             |           |           |           |
| H           | -4.369500 | -0.332019 | -0.542930 |             |           |           |           |
| Si          | -5.639475 | -1.175889 | -0.181171 | <b>TS4a</b> |           |           |           |
| C           | -5.074679 | -2.783138 | 0.594418  | Ir          | 0.184303  | -0.053959 | 0.176912  |
| C           | -6.725118 | -0.172898 | 0.967529  | P           | 0.304221  | 0.227450  | 2.501176  |
| C           | -6.391995 | -1.407123 | -1.880948 | O           | 1.928039  | 0.540323  | 2.744438  |
| H           | -7.631983 | -0.744150 | 1.191860  | C           | 2.725344  | 0.579642  | 1.614757  |
| H           | -6.229890 | 0.042540  | 1.916854  | C           | 4.083948  | 0.824771  | 1.762387  |
| H           | -7.042798 | 0.768924  | 0.513493  | C           | 4.879205  | 0.881833  | 0.618730  |
| H           | -5.948204 | -3.414731 | 0.786698  | C           | 4.336764  | 0.702484  | -0.654081 |
| H           | -4.409364 | -3.346204 | -0.064732 | C           | 2.975876  | 0.459277  | -0.760416 |
| H           | -4.571618 | -2.620753 | 1.550222  | C           | 2.130720  | 0.373712  | 0.358086  |
| H           | -7.311871 | -1.995596 | -1.802049 | O           | 2.423597  | 0.296585  | -2.026654 |
| H           | -6.650378 | -0.451273 | -2.343252 | P           | 0.787440  | 0.007082  | -2.077826 |
| H           | -5.716636 | -1.938653 | -2.555896 | C           | 0.190661  | 1.368971  | -3.134355 |
|             |           |           |           | C           | 0.729146  | -1.467219 | -3.156687 |
|             |           |           |           | H           | -0.285343 | 1.407143  | 0.063229  |
|             |           |           |           | C           | 0.040661  | -1.160728 | 3.654806  |
|             |           |           |           | C           | -0.477909 | 1.668590  | 3.290640  |
|             |           |           |           | O           | -1.955882 | -0.761860 | -0.068325 |
|             |           |           |           | Si          | -3.962670 | -1.812864 | -1.215925 |
|             |           |           |           | C           | -3.894814 | -0.375285 | -2.382995 |
|             |           |           |           | C           | -2.870373 | -3.291642 | -1.445914 |
|             |           |           |           | C           | -5.690653 | -2.241062 | -0.658181 |
|             |           |           |           | C           | -2.777161 | -0.712488 | 0.903286  |
|             |           |           |           | H           | -3.830362 | -1.128040 | 0.585401  |
|             |           |           |           | O           | -2.709042 | -0.350937 | 2.045303  |
|             |           |           |           | H           | 0.562698  | -2.047227 | 3.291875  |
|             |           |           |           | H           | 0.433477  | -0.895242 | 4.638501  |
|             |           |           |           | H           | -0.237431 | 2.565914  | 2.719829  |
|             |           |           |           | H           | -0.101680 | 1.778340  | 4.309721  |
|             |           |           |           | H           | -1.558058 | 1.524937  | 3.305519  |
|             |           |           |           | H           | -1.026912 | -1.369018 | 3.727501  |
|             |           |           |           | H           | 1.312413  | -1.291944 | -4.063097 |
|             |           |           |           | H           | 1.145169  | -2.325686 | -2.627555 |
|             |           |           |           | H           | -0.304958 | -1.685565 | -3.433263 |
|             |           |           |           | H           | 0.744140  | 1.391110  | -4.075245 |
|             |           |           |           | H           | 0.333898  | 2.314088  | -2.609692 |
|             |           |           |           | H           | -0.874318 | 1.243665  | -3.342018 |
|             |           |           |           | H           | 4.949666  | 0.753671  | -1.544430 |
|             |           |           |           | H           | 5.940697  | 1.072699  | 0.720005  |
|             |           |           |           | H           | 4.501215  | 0.970974  | 2.750079  |
|             |           |           |           | H           | -3.341794 | -3.960220 | -2.176284 |
|             |           |           |           | H           | -1.878085 | -3.016672 | -1.800310 |
|             |           |           |           | H           | -2.765778 | -3.854529 | -0.515198 |
|             |           |           |           | H           | -4.539589 | -0.594894 | -3.242280 |
|             |           |           |           | H           | -4.278727 | 0.533789  | -1.914006 |
|             |           |           |           | H           | -2.882781 | -0.184593 | -2.735766 |
|             |           |           |           | H           | -6.204904 | -2.711280 | -1.507164 |
|             |           |           |           | H           | -5.700434 | -2.955824 | 0.167441  |
|             |           |           |           | H           | -6.269015 | -1.360673 | -0.370130 |
|             |           |           |           |             |           |           |           |
|             |           |           |           | <b>IM4</b>  |           |           |           |
|             |           |           |           | C           | -1.102477 | 1.700981  | 0.060359  |
|             |           |           |           | C           | -1.103167 | 3.085703  | -0.020827 |
|             |           |           |           | C           | 0.081808  | 3.833661  | -0.114728 |
|             |           |           |           | C           | 1.288835  | 3.117455  | -0.078664 |
|             |           |           |           |             |           |           |           |
| <b>TS3a</b> |           |           |           |             |           |           |           |
| C           | -0.325201 | 1.249977  | 1.072920  |             |           |           |           |
| C           | -0.685661 | 2.417440  | 0.415766  |             |           |           |           |
| C           | 0.184959  | 3.512979  | 0.297664  |             |           |           |           |
| C           | 1.444140  | 3.395380  | 0.908296  |             |           |           |           |
| C           | 1.840252  | 2.243868  | 1.573960  |             |           |           |           |
| C           | 0.944493  | 1.177015  | 1.646632  |             |           |           |           |
| O           | -1.958399 | 2.511734  | -0.136849 |             |           |           |           |
| P           | -2.310749 | 3.933626  | -0.930031 |             |           |           |           |
| C           | -2.825331 | 3.340057  | -2.576558 |             |           |           |           |
| Ir          | -0.344791 | 5.163402  | -0.691411 |             |           |           |           |
| P           | 1.788090  | 5.805578  | -0.006220 |             |           |           |           |
| C           | 3.124295  | 6.017540  | -1.229611 |             |           |           |           |
| O           | 2.316342  | 4.472991  | 0.851263  |             |           |           |           |
| C           | -3.852597 | 4.467164  | -0.121962 |             |           |           |           |
| C           | 2.018475  | 7.156963  | 1.189647  |             |           |           |           |
| O           | -0.977972 | 6.897118  | -1.984544 |             |           |           |           |
| C           | -0.376020 | 7.963839  | -2.148770 |             |           |           |           |
| O           | 0.685501  | 8.443397  | -1.757428 |             |           |           |           |
| H           | -1.972070 | 2.888766  | -3.084821 |             |           |           |           |
| H           | -3.621003 | 2.597845  | -2.484606 |             |           |           |           |
| H           | -3.643472 | 4.733226  | 0.914419  |             |           |           |           |
| H           | -4.593070 | 3.665192  | -0.148139 |             |           |           |           |
| H           | -4.246646 | 5.344702  | -0.639600 |             |           |           |           |
| H           | -3.180804 | 4.186162  | -3.169135 |             |           |           |           |
| H           | 4.093039  | 6.063971  | -0.727854 |             |           |           |           |
| H           | 3.121841  | 5.175226  | -1.922982 |             |           |           |           |
| H           | 2.946336  | 6.940808  | -1.782600 |             |           |           |           |
| H           | 3.043575  | 7.159983  | 1.565375  |             |           |           |           |
| H           | 1.328235  | 7.022788  | 2.022898  |             |           |           |           |
| H           | 1.801020  | 8.101244  | 0.688631  |             |           |           |           |
| H           | -0.928493 | 5.838059  | 0.562378  |             |           |           |           |
| H           | 2.821839  | 2.191089  | 2.026561  |             |           |           |           |
| H           | 1.240065  | 0.272420  | 2.164190  |             |           |           |           |
| H           | -1.023865 | 0.426097  | 1.137079  |             |           |           |           |
| H           | -1.018710 | 8.656387  | -2.868093 |             |           |           |           |
| Si          | -0.247174 | 10.385759 | -3.197910 |             |           |           |           |
| C           | -1.781542 | 10.667971 | -4.220297 |             |           |           |           |
| C           | -0.215362 | 11.322646 | -1.602618 |             |           |           |           |
| C           | 1.293897  | 10.137536 | -4.191372 |             |           |           |           |



|             |           |           |           |            |           |           |           |
|-------------|-----------|-----------|-----------|------------|-----------|-----------|-----------|
| C           | 1.329452  | 1.733340  | 0.001530  | H          | -2.437938 | 5.285173  | 2.622675  |
| C           | 0.123384  | 1.036072  | 0.066087  | H          | -4.045574 | 5.329778  | 1.855240  |
| O           | -2.318968 | 3.756504  | -0.001670 | H          | -3.059040 | 6.815370  | 1.983337  |
| P           | -2.241100 | 5.417637  | -0.036782 | H          | -3.623903 | 6.983956  | -0.954468 |
| C           | -3.483170 | 5.801372  | -1.317397 | H          | 4.437774  | 5.520287  | -1.210291 |
| Ir          | 0.049795  | 5.820841  | -0.282957 | H          | 3.040855  | 5.717591  | -2.287871 |
| P           | 2.362283  | 5.478932  | -0.174496 | H          | 3.595181  | 7.085650  | -1.291605 |
| C           | 3.515696  | 5.865730  | -1.535332 | H          | 4.280478  | 5.456617  | 1.501385  |
| O           | 2.485335  | 3.821144  | -0.117342 | H          | 2.745463  | 5.447117  | 2.405042  |
| C           | -3.023116 | 5.913163  | 1.530598  | H          | 3.323645  | 6.953171  | 1.670431  |
| C           | 3.234505  | 6.015739  | 1.331004  | H          | 0.103014  | 5.785273  | 1.536789  |
| O           | -0.015371 | 8.160086  | -0.684486 | H          | 2.284163  | 1.215278  | -0.217150 |
| C           | -0.133160 | 8.961257  | 0.417835  | H          | 0.144474  | -0.062003 | -0.209468 |
| O           | -0.224813 | 8.531218  | 1.524353  | H          | -2.035839 | 1.133786  | -0.055737 |
| H           | -3.135948 | 5.455867  | -2.291851 | Si         | 0.067056  | 8.889114  | -2.593749 |
| H           | -4.424315 | 5.300906  | -1.079656 | C          | 0.090575  | 7.315063  | -3.595191 |
| H           | -2.412851 | 5.559014  | 2.361726  | C          | -1.453807 | 9.928426  | -2.907332 |
| H           | -4.026398 | 5.489637  | 1.606985  | C          | 1.652056  | 9.869581  | -2.710257 |
| H           | -3.076959 | 7.002758  | 1.583643  | H          | 0.219605  | 7.545257  | -4.657167 |
| H           | -3.653347 | 6.879759  | -1.356041 | H          | 0.915535  | 6.658738  | -3.306067 |
| H           | 4.481325  | 5.392398  | -1.345056 | H          | -0.844510 | 6.757163  | -3.498175 |
| H           | 3.119267  | 5.489793  | -2.479247 | H          | 1.781103  | 10.248036 | -3.729175 |
| H           | 3.656529  | 6.946435  | -1.607632 | H          | 1.653146  | 10.736468 | -2.043569 |
| H           | 4.245705  | 5.604756  | 1.352678  | H          | 2.528405  | 9.260050  | -2.475623 |
| H           | 2.683634  | 5.673316  | 2.207236  | H          | -1.464295 | 10.256022 | -3.951772 |
| H           | 3.282909  | 7.106877  | 1.355758  | H          | -2.375042 | 9.365387  | -2.734996 |
| H           | 0.086015  | 6.097900  | 1.226431  | H          | -1.485688 | 10.830968 | -2.291054 |
| H           | 2.282374  | 1.220980  | 0.020108  | H          | -0.351106 | 10.086167 | 0.017048  |
| H           | 0.139233  | -0.045082 | 0.129645  |            |           |           |           |
| H           | -2.039424 | 1.163468  | 0.124766  |            |           |           |           |
| Si          | 0.039169  | 8.810824  | -2.344218 | <b>IM5</b> |           |           |           |
| C           | 0.054272  | 7.281920  | -3.414325 | C          | -0.737067 | 1.422123  | 0.013974  |
| C           | -1.507283 | 9.832373  | -2.576759 | C          | -0.865590 | 2.797449  | 0.141388  |
| C           | 1.604868  | 9.819250  | -2.481254 | C          | 0.242842  | 3.649349  | 0.267463  |
| H           | 0.030714  | 7.579736  | -4.468139 | C          | 1.507940  | 3.041979  | 0.296187  |
| H           | 0.955482  | 6.680244  | -3.275602 | C          | 1.678752  | 1.670996  | 0.171526  |
| H           | -0.820966 | 6.648743  | -3.245783 | C          | 0.544586  | 0.871678  | 0.028153  |
| H           | 1.700424  | 10.214245 | -3.497688 | O          | -2.140337 | 3.354541  | 0.151814  |
| H           | 1.611819  | 10.676816 | -1.803144 | P          | -2.217186 | 5.007273  | 0.318062  |
| H           | 2.497375  | 9.221442  | -2.279539 | C          | -3.281060 | 5.475604  | -1.088178 |
| H           | -1.552648 | 10.195803 | -3.608383 | Ir         | 0.029386  | 5.633044  | 0.406018  |
| H           | -2.413428 | 9.247166  | -2.399053 | P          | 2.349064  | 5.478455  | 0.609017  |
| H           | -1.538725 | 10.711770 | -1.928196 | C          | 3.461460  | 6.164557  | -0.664052 |
| H           | -0.135115 | 10.033012 | 0.171363  | O          | 2.630793  | 3.846072  | 0.463092  |
|             |           |           |           | C          | -3.265318 | 5.227394  | 1.789896  |
|             |           |           |           | C          | 3.140227  | 5.894634  | 2.194515  |
|             |           |           |           | O          | -0.106754 | 8.322776  | -1.670786 |
| <b>TS5a</b> |           |           |           | C          | -0.234471 | 8.665491  | -0.420428 |
| C           | -1.100577 | 1.677854  | -0.074996 | O          | -0.211524 | 7.863815  | 0.504900  |
| C           | -1.107002 | 3.063568  | -0.007574 | H          | -2.750107 | 5.299863  | -2.024422 |
| C           | 0.077824  | 3.814810  | -0.041671 | H          | -4.199032 | 4.884219  | -1.079454 |
| C           | 1.288335  | 3.108433  | -0.097539 | H          | -2.745395 | 4.836111  | 2.664667  |
| C           | 1.330070  | 1.723428  | -0.166034 | H          | -4.213509 | 4.700521  | 1.665662  |
| C           | 0.126155  | 1.019643  | -0.157602 | H          | -3.455874 | 6.292279  | 1.942804  |
| O           | -2.323017 | 3.727263  | 0.098025  | H          | -3.534175 | 6.535819  | -1.015912 |
| P           | -2.246586 | 5.384428  | 0.224125  | H          | 4.473391  | 5.776973  | -0.528972 |
| C           | -3.468976 | 5.904865  | -1.024662 | H          | 3.100125  | 5.885447  | -1.654473 |
| Ir          | 0.037984  | 5.802965  | 0.003670  | H          | 3.478391  | 7.253926  | -0.585333 |
| P           | 2.354013  | 5.474870  | 0.024779  | H          | 4.183047  | 5.571183  | 2.197285  |
| C           | 3.464215  | 6.001818  | -1.323991 | H          | 2.605297  | 5.399816  | 3.005465  |
| O           | 2.481677  | 3.819121  | -0.080468 | H          | 3.091953  | 6.974888  | 2.350653  |
| C           | -3.032194 | 5.734767  | 1.826726  | H          | -0.065037 | 5.595438  | 1.939534  |
| C           | 3.270560  | 5.868835  | 1.547785  | H          | 2.673117  | 1.244717  | 0.193963  |
| O           | -0.046827 | 8.277270  | -0.935316 | H          | 0.661388  | -0.200839 | -0.068584 |
| C           | -0.286869 | 8.999958  | 0.173570  | H          | -1.618659 | 0.802605  | -0.085893 |
| O           | -0.419092 | 8.474189  | 1.242678  | Si         | -0.102041 | 9.290500  | -3.152705 |
| H           | -3.107029 | 5.657208  | -2.023243 | C          | -1.372697 | 8.452028  | -4.226924 |
| H           | -4.418991 | 5.394185  | -0.853635 |            |           |           |           |

|             |           |           |           |             |           |           |           |
|-------------|-----------|-----------|-----------|-------------|-----------|-----------|-----------|
| C           | -0.562255 | 11.044618 | -2.697722 | C           | -1.045752 | 1.767641  | -0.035087 |
| C           | 1.638643  | 9.135507  | -3.801790 | C           | -1.118199 | 3.166583  | 0.052452  |
| H           | -1.418685 | 8.938970  | -5.205849 | C           | 0.010382  | 3.974198  | 0.074235  |
| H           | -1.122358 | 7.401419  | -4.395221 | C           | 1.261590  | 3.358357  | 0.017591  |
| H           | -2.372973 | 8.501513  | -3.788859 | C           | 1.394509  | 1.970849  | -0.054869 |
| H           | 1.732330  | 9.665138  | -4.754897 | Ir          | -2.735039 | 0.606861  | -0.148474 |
| H           | 2.370201  | 9.568321  | -3.114195 | P           | -1.090569 | -1.027061 | -0.153010 |
| H           | 1.909168  | 8.091545  | -3.979746 | C           | -0.887293 | -2.131351 | 1.285394  |
| H           | -0.592561 | 11.645998 | -3.612153 | O           | -2.369561 | 3.758868  | 0.129987  |
| H           | -1.552198 | 11.116633 | -2.238713 | P           | -3.675641 | 2.713414  | 0.090891  |
| H           | 0.164802  | 11.519050 | -2.032869 | C           | -4.538145 | 3.162310  | 1.635594  |
| H           | -0.370582 | 9.731527  | -0.202052 | O           | 0.351023  | -0.178598 | -0.123190 |
| <b>TS3b</b> |           |           |           | C           | -4.677584 | 3.497199  | -1.224025 |
| C           | 3.840364  | 0.968430  | -1.444291 | C           | -0.799689 | -2.111750 | -1.597239 |
| C           | 3.354636  | -0.153599 | -0.785059 | C           | -4.393775 | -0.545988 | -2.902375 |
| C           | 4.023252  | -1.388104 | -0.815548 | O           | -3.532608 | -0.002741 | -3.429367 |
| C           | 5.236066  | -1.448185 | -1.520820 | O           | -5.314775 | -1.131148 | -2.458581 |
| C           | 5.756860  | -0.350284 | -2.193767 | Si          | -6.108576 | -1.699043 | -0.426264 |
| C           | 5.041246  | 0.847813  | -2.146507 | C           | -6.757297 | -0.200011 | 0.450828  |
| O           | 2.178238  | -0.055112 | -0.063513 | C           | -7.432028 | -2.565947 | -1.402887 |
| P           | 1.729208  | -1.443317 | 0.779116  | C           | -4.932398 | -2.886756 | 0.375901  |
| C           | -0.063559 | -1.446703 | 0.410203  | H           | -0.812012 | -1.514474 | -2.509903 |
| Ir          | 3.246350  | -3.048679 | 0.119612  | H           | 0.170412  | -2.604899 | -1.508416 |
| P           | 5.269932  | -3.880264 | -0.606505 | H           | -0.943780 | -1.540905 | 2.200146  |
| C           | 5.500113  | -5.275786 | -1.768253 | H           | 0.082073  | -2.631377 | 1.238381  |
| O           | 5.936625  | -2.641167 | -1.533292 | H           | -1.680567 | -2.881495 | 1.296591  |
| C           | 6.563193  | -4.152709 | 0.653162  | H           | -1.584049 | -2.869839 | -1.655740 |
| C           | 1.809217  | -0.879450 | 2.513831  | H           | -4.802789 | 4.561872  | -1.016451 |
| C           | 1.241193  | -4.501018 | -2.459654 | H           | -4.175579 | 3.381056  | -2.185552 |
| Si          | 0.629539  | -5.932223 | -1.493759 | H           | -5.659911 | 3.022345  | -1.274805 |
| C           | -0.741624 | -5.680904 | -0.280909 | H           | -4.655239 | 4.246184  | 1.694308  |
| O           | -0.648002 | -6.911781 | -3.021662 | H           | -3.951393 | 2.816831  | 2.487038  |
| C           | -1.122340 | -7.001092 | -4.093790 | H           | -5.522534 | 2.691100  | 1.666868  |
| O           | -1.592007 | -7.101719 | -5.132547 | H           | -3.153548 | 0.224168  | 1.284995  |
| C           | 1.731895  | -7.395285 | -1.252490 | H           | -0.087152 | 5.049952  | 0.139222  |
| H           | 2.398302  | -4.434635 | 0.390483  | H           | 2.153486  | 3.973482  | 0.033785  |
| H           | 3.371158  | -3.680053 | 1.548899  | H           | 2.367113  | 1.497753  | -0.089754 |
| H           | 4.834638  | -5.153138 | -2.623309 | H           | -4.122807 | -0.334173 | -0.423588 |
| H           | 6.532150  | -5.304924 | -2.123591 | H           | -7.692705 | -0.486465 | 0.947520  |
| H           | 6.597787  | -3.287926 | 1.315734  | H           | -6.046391 | 0.177898  | 1.182243  |
| H           | 7.537436  | -4.291116 | 0.180385  | H           | -6.999893 | 0.595897  | -0.257004 |
| H           | 6.311703  | -5.035183 | 1.245478  | H           | -5.533076 | -3.652260 | 0.883092  |
| H           | 5.267737  | -6.213458 | -1.258604 | H           | -4.321968 | -3.401581 | -0.369726 |
| H           | -0.495861 | -0.468170 | 0.628836  | H           | -4.280358 | -2.390868 | 1.091583  |
| H           | -0.219214 | -1.674764 | -0.644682 | H           | -8.114163 | -3.042047 | -0.687628 |
| H           | -0.557903 | -2.204142 | 1.022471  | H           | -8.021644 | -1.877506 | -2.011360 |
| H           | 1.241010  | 0.043489  | 2.644781  | H           | -7.032422 | -3.349754 | -2.049061 |
| H           | 2.851911  | -0.708016 | 2.781121  | <b>TS5b</b> |           |           |           |
| H           | 1.405919  | -1.656879 | 3.166368  | C           | -3.359746 | 0.677456  | -1.084488 |
| H           | 3.303752  | 1.907213  | -1.402163 | C           | -2.566259 | -0.272764 | -0.425778 |
| H           | 5.435161  | 1.714683  | -2.664498 | C           | -3.101637 | -1.558813 | -0.264880 |
| H           | 6.694736  | -0.426075 | -2.728265 | C           | -4.352026 | -1.905669 | -0.753437 |
| H           | 1.165490  | -8.288909 | -0.981566 | C           | -5.094729 | -0.927624 | -1.416283 |
| H           | 2.336786  | -7.606305 | -2.136529 | C           | -4.614857 | 0.371517  | -1.588041 |
| H           | 2.412021  | -7.165915 | -0.425130 | Ir          | -0.716851 | 0.205396  | 0.296442  |
| H           | -1.246353 | -6.618867 | -0.039514 | P           | -1.354647 | 2.276097  | -0.632184 |
| H           | -0.300562 | -5.290498 | 0.642519  | C           | -0.468404 | 2.874930  | -2.103839 |
| H           | -1.477675 | -4.956499 | -0.635002 | O           | -2.359115 | -2.512795 | 0.413935  |
| H           | 0.475781  | -3.783033 | -2.753607 | P           | -0.854973 | -2.053859 | 0.955008  |
| H           | 1.867256  | -4.046915 | -1.653577 | C           | 0.239741  | -3.260428 | 0.145325  |
| H           | 1.885010  | -4.754642 | -3.301607 | O           | -2.876386 | 1.968893  | -1.228628 |
| <b>TS4b</b> |           |           |           | C           | -0.911144 | -2.520201 | 2.710789  |
| C           | 0.238662  | 1.202861  | -0.073945 | C           | -1.632467 | 3.732750  | 0.418703  |
|             |           |           |           | Si          | 2.415067  | 1.067953  | 1.663573  |
|             |           |           |           | C           | 3.503872  | -0.409498 | 1.999344  |

|             |           |           |           |             |           |           |           |
|-------------|-----------|-----------|-----------|-------------|-----------|-----------|-----------|
| C           | 1.589172  | 1.569003  | 3.289547  | H           | -4.291764 | -5.645593 | 2.239262  |
| C           | 3.157393  | 2.598282  | 0.896666  | H           | 0.449870  | 0.764367  | 2.186290  |
| O           | 2.254432  | 0.296756  | -0.389836 | H           | 0.702751  | -0.840477 | 2.920616  |
| C           | 1.118530  | 0.028842  | -0.762976 | H           | -0.895957 | -0.070174 | 3.001016  |
| H           | -6.074020 | -1.182451 | -1.803173 | H           | -2.645790 | -2.272484 | 1.990116  |
| H           | -5.198886 | 1.127721  | -2.095548 | H           | -1.012446 | -5.485534 | 3.671515  |
| H           | -4.732980 | -2.908918 | -0.616092 | H           | 0.470465  | -5.869554 | 4.538469  |
| H           | -0.126413 | -4.272686 | 0.327611  | H           | 0.890521  | -8.411800 | 2.616531  |
| H           | 1.253998  | -3.165342 | 0.539397  | H           | 0.263027  | -4.266232 | 3.842769  |
| H           | 0.257638  | -3.066310 | -0.927611 | H           | -0.588782 | -7.945498 | 1.777233  |
| H           | -1.043055 | 3.669493  | -2.583850 | H           | 3.239326  | -6.170528 | 2.927856  |
| H           | 0.512443  | 3.259960  | -1.816188 | H           | 2.947771  | -4.570782 | 2.244988  |
| H           | -0.332914 | 2.048945  | -2.802828 | H           | 3.189307  | -5.960755 | 1.175353  |
| H           | -1.631007 | -1.889470 | 3.232886  | H           | 0.924363  | -8.122236 | 0.874994  |
| H           | -1.208548 | -3.566281 | 2.808219  | H           | -1.445291 | -3.535489 | 2.182809  |
| H           | 0.075171  | -2.381444 | 3.158834  |             |           |           |           |
| H           | -2.140270 | 4.512181  | -0.153002 |             |           |           |           |
| H           | -0.674102 | 4.113998  | 0.777870  |             |           |           |           |
| H           | -2.247420 | 3.453221  | 1.274453  | <b>TS7b</b> |           |           |           |
| H           | -1.350044 | 0.630007  | 1.654078  | C           | -3.120412 | 0.798933  | -1.026704 |
| H           | 0.560577  | 0.715955  | 1.287134  | C           | -2.428506 | -0.278770 | -0.494253 |
| H           | 1.072937  | 0.737573  | 3.772937  | C           | -3.061422 | -1.459254 | -0.090379 |
| H           | 2.387919  | 1.907732  | 3.962527  | C           | -4.454858 | -1.502725 | -0.223305 |
| H           | 4.094608  | -0.206876 | 2.898988  | C           | -5.189470 | -0.448977 | -0.746975 |
| H           | 0.882488  | 2.391732  | 3.166424  | C           | -4.505824 | 0.698224  | -1.147858 |
| H           | 2.915812  | -1.308901 | 2.201586  | O           | -1.048383 | -0.185957 | -0.359412 |
| H           | 3.708901  | 3.141178  | 1.671578  | P           | -0.264261 | -1.521736 | 0.225776  |
| H           | 2.387467  | 3.277360  | 0.520216  | C           | 0.700988  | -0.840777 | 1.606328  |
| H           | 3.833950  | 2.359315  | 0.076347  | Ir          | -2.005768 | -3.060016 | 0.647793  |
| H           | 4.177184  | -0.620267 | 1.168688  | C           | -0.714317 | -4.688042 | 0.206443  |
| O           | 0.515531  | -0.393800 | -1.725992 | O           | -1.199461 | -4.875867 | -0.890157 |
|             |           |           |           | O           | -5.135441 | -2.640791 | 0.202123  |
|             |           |           |           | P           | -4.213848 | -3.877264 | 0.796407  |
|             |           |           |           | C           | -4.977037 | -4.220762 | 2.408767  |
|             |           |           |           | C           | 0.932738  | -1.899821 | -1.090998 |
|             |           |           |           | C           | -4.628741 | -5.281442 | -0.280031 |
|             |           |           |           | O           | 0.408929  | -5.162289 | 0.635628  |
|             |           |           |           | Si          | 1.055402  | -5.864442 | 2.118445  |
| <b>IM6b</b> |           |           |           | C           | 1.413073  | -4.466561 | 3.306254  |
| C           | -3.394082 | 0.711236  | -1.106642 | C           | 2.583848  | -6.730096 | 1.511490  |
| C           | -2.627368 | -0.215767 | -0.416405 | C           | -0.265475 | -7.025021 | 2.751636  |
| C           | -3.067891 | -1.524949 | -0.190343 | H           | -5.063432 | 1.530198  | -1.560265 |
| C           | -4.344114 | -1.869730 | -0.650734 | H           | -2.587202 | 1.688167  | -1.335914 |
| C           | -5.144076 | -0.974384 | -1.345092 | H           | -6.265019 | -0.527302 | -0.834092 |
| C           | -4.650596 | 0.312557  | -1.565537 | H           | -5.711833 | -5.414720 | -0.317635 |
| O           | -1.386648 | 0.166295  | 0.074604  | H           | -4.161189 | -6.188550 | 0.108901  |
| P           | -0.470884 | -1.005679 | 0.820309  | H           | -4.245036 | -5.094909 | -1.283130 |
| C           | -0.007257 | -0.207178 | 2.384574  | H           | 1.509706  | -1.006126 | -1.336621 |
| Ir          | -1.878896 | -2.897211 | 0.782745  | H           | 1.607537  | -2.692495 | -0.761241 |
| C           | -0.478014 | -4.284814 | 0.258744  | H           | 0.398330  | -2.242670 | -1.977983 |
| O           | -0.623537 | -3.974528 | -0.920729 | H           | -4.820095 | -3.370704 | 3.073207  |
| O           | -4.824746 | -3.146611 | -0.396121 | H           | -6.048467 | -4.389717 | 2.283091  |
| P           | -3.795980 | -4.207958 | 0.367645  | H           | -4.519340 | -5.108319 | 2.850746  |
| C           | -4.819073 | -4.835170 | 1.731645  | H           | 1.308958  | -0.004625 | 1.254811  |
| C           | 1.035026  | -1.054161 | -0.198279 | H           | 1.349427  | -1.615684 | 2.018280  |
| C           | -3.647997 | -5.566111 | -0.832413 | H           | 0.023327  | -0.492711 | 2.386164  |
| O           | 0.326058  | -5.179777 | 0.698133  | H           | -2.140681 | -2.366933 | 2.023572  |
| Si          | 0.909001  | -5.993119 | 2.143617  | H           | -0.548689 | -7.761240 | 1.994658  |
| C           | 2.737290  | -5.635824 | 2.115626  | H           | 0.114104  | -7.576547 | 3.617500  |
| C           | 0.491091  | -7.779351 | 1.817681  | H           | 3.104597  | -7.209728 | 2.345946  |
| C           | 0.068414  | -5.327849 | 3.675238  | H           | -1.166296 | -6.497590 | 3.077559  |
| H           | -5.263080 | 1.024863  | -2.105204 | H           | 2.336052  | -7.504712 | 0.781860  |
| H           | -3.021578 | 1.712522  | -1.277298 | H           | 1.805206  | -4.876829 | 4.242401  |
| H           | -6.121608 | -1.273225 | -1.699419 | H           | 0.518292  | -3.889783 | 3.553435  |
| H           | -4.640111 | -5.875450 | -1.166755 | H           | 2.172451  | -3.786189 | 2.911811  |
| H           | -3.140490 | -6.413587 | -0.366349 | H           | 3.282369  | -6.033090 | 1.041694  |
| H           | -3.059151 | -5.230328 | -1.686534 | H           | -1.540492 | -4.427105 | 1.490637  |
| H           | 1.423264  | -0.042891 | -0.334341 |             |           |           |           |
| H           | 1.790794  | -1.670891 | 0.293104  |             |           |           |           |
| H           | 0.800310  | -1.492842 | -1.168542 |             |           |           |           |
| H           | -5.006837 | -4.032245 | 2.444762  |             |           |           |           |
| H           | -5.770262 | -5.206436 | 1.344901  |             |           |           |           |

|             |           |           |           |             |           |           |           |
|-------------|-----------|-----------|-----------|-------------|-----------|-----------|-----------|
| <b>IM7</b>  |           |           |           | O           | -2.421903 | 3.774387  | -0.005005 |
| C           | -1.382190 | 0.861902  | -1.926693 | C           | -1.339139 | -2.222171 | -1.166922 |
| C           | -0.098009 | 1.016711  | -1.426430 | C           | -4.784843 | 3.194919  | -1.267413 |
| C           | 0.671229  | -0.091011 | -1.019782 | H           | -1.542854 | -1.638386 | -2.064574 |
| C           | 0.117888  | -1.375242 | -1.184432 | H           | -0.395631 | -2.761872 | -1.269199 |
| C           | -1.163578 | -1.555644 | -1.681578 | H           | -0.771039 | -1.512651 | 2.595832  |
| C           | -1.900455 | -0.427958 | -2.046232 | H           | -0.037349 | -2.756103 | 1.548031  |
| O           | 0.439937  | 2.285390  | -1.332212 | H           | -1.781544 | -2.801123 | 1.910110  |
| P           | 1.946546  | 2.404633  | -0.622235 | H           | -2.153816 | -2.937687 | -1.030107 |
| C           | 2.892637  | 3.379813  | -1.826775 | H           | -4.880844 | 4.275303  | -1.391978 |
| Ir          | 2.470441  | 0.151341  | -0.230606 | H           | -4.315103 | 2.753713  | -2.146826 |
| O           | 4.631304  | -0.085427 | 2.480705  | H           | -5.778487 | 2.755249  | -1.149474 |
| Si          | 5.175634  | 0.168089  | 4.157804  | H           | -4.779781 | 4.664502  | 1.412501  |
| C           | 6.835564  | 1.014585  | 4.070262  | H           | -3.976162 | 3.505935  | 2.505392  |
| O           | 0.875029  | -2.483680 | -0.851856 | H           | -5.557765 | 3.109453  | 1.804006  |
| P           | 2.384692  | -2.185824 | -0.204879 | H           | -5.150433 | -0.422739 | 0.248230  |
| C           | 3.479267  | -3.169246 | -1.272328 | H           | -0.104247 | 4.963924  | -0.024796 |
| C           | 4.445073  | 0.864011  |           | H           | 2.086799  | 3.793639  | -0.020554 |
| 1.600813    |           |           |           | H           | 2.224979  | 1.314283  | 0.036315  |
| O           | 4.526036  | 2.054058  | 1.736932  | O           | -3.802468 | -0.026477 | -1.248806 |
| C           | 2.318017  | -3.078453 | 1.380793  | C           | -4.968305 | -0.527745 | -0.859296 |
| C           | 1.641094  | 3.514724  | 0.785775  | O           | -5.766545 | -1.049084 | -1.580915 |
| C           | 3.861689  | 1.180678  | 5.016284  | <b>IM4c</b> |           |           |           |
| C           | 5.271685  | -1.587393 | 4.780270  | C           | -0.978537 | 1.845216  | 0.121245  |
| H           | -2.901923 | -0.558230 | -2.438023 | C           | -1.127453 | 3.264036  | -0.058184 |
| H           | -1.566446 | -2.554359 | -1.786500 | C           | -0.033139 | 4.076539  | -0.313134 |
| H           | -1.954562 | 1.732121  | -2.219797 | C           | 1.223516  | 3.482168  | -0.431666 |
| H           | 1.199018  | 4.451064  | 0.439506  | C           | 1.432684  | 2.103256  | -0.298233 |
| H           | 2.590538  | 3.709601  | 1.287852  | C           | 0.341575  | 1.300077  | -0.035415 |
| H           | 0.960674  | 3.032596  | 1.489156  | O           | -2.351431 | 3.814028  | 0.039829  |
| H           | 2.061755  | -4.127192 | 1.217437  | P           | -3.660334 | 2.723033  | 0.252070  |
| H           | 3.292775  | -3.008456 | 1.868628  | C           | -4.519505 | 3.019302  | -1.329071 |
| H           | 1.568377  | -2.620394 | 2.027298  | O           | 0.518060  | -0.040553 | 0.094028  |
| H           | 3.028419  | 2.803101  | -2.741737 | P           | -0.854879 | -0.934250 | 0.517698  |
| H           | 2.365709  | 4.308486  | -2.054882 | C           | -1.021342 | -2.103271 | -0.863432 |
| H           | 3.871721  | 3.613123  | -1.402046 | Ir          | -2.487060 | 0.729030  | 0.647271  |
| H           | 3.131434  | -4.203306 | -1.315747 | O           | -3.871879 | -0.551388 | -0.253248 |
| H           | 4.495108  | -3.144826 | -0.871011 | C           | -5.132854 | -0.240516 | -0.284282 |
| H           | 3.485653  | -2.745393 | -2.276726 | O           | -5.658933 | 0.747140  | 0.209242  |
| H           | 3.329916  | 0.118905  | -1.513290 | C           | -0.178325 | -1.912034 | 1.898325  |
| H           | 4.281083  | 0.395725  | 0.563416  | C           | -4.616632 | 3.611691  | 1.515008  |
| H           | 7.233384  | 1.155031  | 5.080241  | H           | -1.237531 | -1.549167 | -1.776671 |
| H           | 7.562647  | 0.419379  | 3.511441  | H           | -0.110945 | -2.692080 | -0.988508 |
| H           | 6.761151  | 1.998469  | 3.602216  | H           | 0.042218  | -1.259499 | 2.743172  |
| H           | 5.623121  | -1.601299 | 5.816449  | H           | 0.737935  | -2.414305 | 1.581202  |
| H           | 4.295518  | -2.079065 | 4.759847  | H           | -0.909730 | -2.663309 | 2.203893  |
| H           | 5.971097  | -2.184386 | 4.189251  | H           | -1.868243 | -2.761714 | -0.658374 |
| H           | 4.124498  | 1.309734  | 6.070933  | H           | -4.521396 | 4.092611  | -1.528524 |
| H           | 3.769013  | 2.174684  | 4.573632  | H           | -3.993075 | 2.502812  | -2.132404 |
| H           | 2.884610  | 0.690955  | 4.981567  | H           | -5.538007 | 2.642101  | -1.263794 |
| <b>TS3c</b> |           |           |           | H           | -4.808693 | 4.634203  | 1.184597  |
| C           | -1.216148 | 3.139342  | 0.046617  | H           | -4.062571 | 3.631571  | 2.453474  |
| C           | -0.051291 | 3.884032  | 0.012982  | H           | -5.560808 | 3.084776  | 1.655257  |
| C           | 1.173581  | 3.211390  |           | H           | -5.720345 | -0.999288 | -0.826952 |
| 0.013704    |           |           |           | H           | -0.164705 | 5.144382  | -0.423871 |
| C           | 1.267518  | 1.817799  | 0.048224  | H           | 2.078543  | 4.116017  | -0.638376 |
| C           | 0.100906  | 1.075449  | 0.081963  | H           | 2.419181  | 1.671097  | -0.397354 |
| C           | -1.171392 | 1.717138  | 0.138311  | H           | -3.485516 | 0.257909  | 2.025500  |
| O           | 0.169957  | -0.286021 | 0.061847  | Si          | -4.099705 | -0.470803 | 3.296439  |
| P           | -1.277909 | -1.117381 | 0.266847  | C           | -2.791190 | -0.247775 | 4.615388  |
| C           | -0.926593 | -2.146699 | 1.722427  | C           | -5.670905 | 0.480120  | 3.634560  |
| Ir          | -2.788136 | 0.688137  | 0.344822  | C           | -4.396867 | -2.251038 | 2.809364  |
| P           | -3.788990 | 2.816824  | 0.198737  | H           | -4.868586 | -2.774939 | 3.647796  |
| C           | -4.602499 | 3.606858  | 1.618425  | H           | -5.066209 | -2.332210 | 1.951132  |
|             |           |           |           | H           | -3.470522 | -2.778004 | 2.571989  |

|             |           |           |           |             |           |           |           |
|-------------|-----------|-----------|-----------|-------------|-----------|-----------|-----------|
| H           | -6.206190 | 0.003693  | 4.463223  | P           | -3.880880 | 2.602809  | 0.346316  |
| H           | -5.466367 | 1.512897  | 3.925141  | C           | -4.316022 | 2.877341  | -1.409618 |
| H           | -6.322752 | 0.484993  | 2.759378  | O           | 0.288338  | -0.182039 | 0.578085  |
| H           | -3.183104 | -0.606651 | 5.573378  | P           | -1.096600 | -1.113627 | 0.568696  |
| H           | -1.881053 | -0.811400 | 4.400771  | C           | -1.143029 | -1.853477 | -1.097142 |
| H           | -2.523117 | 0.803660  | 4.743687  | Ir          | -2.787913 | 0.526368  | 0.755183  |
|             |           |           |           | O           | -4.243999 | -0.734671 | 0.003664  |
|             |           |           |           | C           | -5.465369 | -0.324941 | -0.245064 |
|             |           |           |           | O           | -5.917822 | 0.777839  | 0.006243  |
| <b>TS5c</b> |           |           |           | C           | -0.578897 | -2.466204 | 1.666428  |
| C           | -1.075283 | 1.761505  | 0.289134  | C           | -5.109858 | 3.510674  | 1.323759  |
| C           | -1.213700 | 3.179226  | 0.142438  | H           | -1.172480 | -1.063202 | -1.848663 |
| C           | -0.119282 | 3.993540  | -0.114173 | H           | -0.266501 | -2.481841 | -1.265597 |
| C           | 1.138982  | 3.403621  | -0.229436 | H           | -0.512807 | -2.126583 | 2.699135  |
| C           | 1.339399  | 2.022604  | -0.101023 | H           | 0.404388  | -2.814114 | 1.341966  |
| C           | 0.242969  | 1.226079  | 0.160225  | H           | -1.293383 | -3.287632 | 1.595470  |
| O           | -2.440310 | 3.730803  | 0.272022  | H           | -2.055235 | -2.448170 | -1.185804 |
| P           | -3.773179 | 2.645638  | 0.228448  | H           | -4.360970 | 3.953693  | -1.587218 |
| C           | -4.360204 | 3.028684  | -1.461518 | H           | -3.549124 | 2.444690  | -2.053683 |
| O           | 0.419998  | -0.123163 | 0.322126  | H           | -5.278839 | 2.420446  | -1.627620 |
| P           | -0.980699 | -1.042708 | 0.456624  | H           | -5.194997 | 4.518668  | 0.912509  |
| C           | -1.012886 | -1.980504 | -1.106910 | H           | -4.786968 | 3.578239  | 2.361389  |
| Ir          | -2.640917 | 0.610021  | 0.580325  | H           | -6.066817 | 2.996854  | 1.258714  |
| O           | -4.314526 | -0.710022 | 0.176794  | H           | -6.075949 | -1.105961 | -0.721525 |
| C           | -5.472663 | -0.198008 | -0.060377 | H           | -0.372612 | 4.999072  | -0.028664 |
| O           | -5.787431 | 0.987860  | 0.046514  | H           | 1.887776  | 3.981585  | -0.221110 |
| C           | -0.440666 | -2.251172 | 1.706266  | H           | 2.205935  | 1.526113  | 0.030229  |
| C           | -4.858314 | 3.539976  | 1.380656  | H           | -2.046077 | 1.231178  | 1.940875  |
| H           | -1.087211 | -1.287665 | -1.946003 | Si          | -3.622433 | -0.232817 | 3.027263  |
| H           | -0.114499 | -2.591009 | -1.215632 | C           | -2.308666 | 0.189233  | 4.306540  |
| H           | -0.376799 | -1.782466 | 2.687935  | C           | -5.216662 | 0.673433  | 3.418276  |
| H           | 0.544945  | -2.630448 | 1.428021  | C           | -3.935803 | -2.084294 | 2.940650  |
| H           | -1.147145 | -3.082052 | 1.740891  | H           | -4.609178 | -2.343727 | 3.765709  |
| H           | -1.900809 | -2.617190 | -1.108543 | H           | -4.418823 | -2.375350 | 2.007757  |
| H           | -4.397140 | 4.113372  | -1.577887 | H           | -3.027865 | -2.674370 | 3.068397  |
| H           | -3.662983 | 2.615075  | -2.191147 | H           | -5.627944 | 0.209092  | 4.323269  |
| H           | -5.345285 | 2.593980  | -1.611360 | H           | -5.054169 | 1.727863  | 3.643598  |
| H           | -4.896624 | 4.587773  | 1.076774  | H           | -5.966751 | 0.591764  | 2.630852  |
| H           | -4.450569 | 3.482063  | 2.389715  | H           | -2.645134 | -0.201024 | 5.274599  |
| H           | -5.853564 | 3.102270  | 1.348669  | H           | -1.333717 | -0.256266 | 4.097474  |
| H           | -6.221373 | -0.941799 | -0.376703 | H           | -2.171858 | 1.267609  | 4.421356  |
| H           | -0.253001 | 5.061585  | -0.222109 |             |           |           |           |
| H           | 1.995478  | 4.036077  | -0.432566 |             |           |           |           |
| H           | 2.323699  | 1.584827  | -0.199182 |             |           |           |           |
| H           | -3.000331 | 0.572969  | 2.158772  | <b>TS6c</b> |           |           |           |
| Si          | -3.834233 | -0.374533 | 3.296011  | C           | -1.030276 | 1.825171  | 0.293637  |
| C           | -2.614034 | 0.067542  | 4.646219  | C           | -1.125907 | 3.222803  | 0.179577  |
| C           | -5.470097 | 0.499273  | 3.469562  | C           | -0.030908 | 4.008106  | -0.153075 |
| C           | -3.953467 | -2.195309 | 2.930118  | C           | 1.199676  | 3.384384  | -0.357208 |
| H           | -4.708200 | -2.622644 | 3.600305  | C           | 1.347258  | 2.002609  | -0.236863 |
| H           | -4.274512 | -2.367953 | 1.902664  | C           | 0.232619  | 1.248266  | 0.097812  |
| H           | -3.014357 | -2.716787 | 3.118033  | O           | -2.345603 | 3.824325  | 0.412000  |
| H           | -6.029691 | -0.006255 | 4.265852  | P           | -3.675596 | 2.806159  | 0.365693  |
| H           | -5.340469 | 1.540452  | 3.769838  | C           | -4.296000 | 3.127807  | -1.322703 |
| H           | -6.071893 | 0.470879  | 2.561509  | O           | 0.373826  | -0.119233 | 0.263242  |
| H           | -2.987632 | -0.346838 | 5.590512  | P           | -1.005709 | -0.986541 | 0.591569  |
| H           | -1.621789 | -0.352469 | 4.470915  | C           | -1.207777 | -2.040877 | -0.884347 |
| H           | -2.514425 | 1.147464  | 4.773246  | Ir          | -2.655682 | 0.704051  | 0.736266  |
|             |           |           |           | O           | -4.374502 | -0.589306 | 0.682655  |
|             |           |           |           | C           | -5.557807 | -0.165638 | 0.217779  |
|             |           |           |           | O           | -5.887833 | 0.983523  | 0.074157  |
| <b>IM5c</b> |           |           |           | C           | -0.365553 | -2.102522 | 1.881448  |
| C           | -1.163393 | 1.728497  | 0.513953  | C           | -4.792158 | 3.675868  | 1.502170  |
| C           | -1.320606 | 3.118989  | 0.369770  | H           | -1.387987 | -1.414960 | -1.759737 |
| C           | -0.229524 | 3.933867  | 0.096530  | H           | -0.309980 | -2.639158 | -1.051410 |
| C           | 1.032753  | 3.350218  | -0.011963 | H           | -0.162415 | -1.541843 | 2.793679  |
| C           | 1.226466  | 1.974663  | 0.130733  | H           | 0.567656  | -2.542237 | 1.522842  |
| C           | 0.124871  | 1.179501  | 0.404551  | H           | -1.078838 | -2.898314 | 2.096576  |
| O           | -2.571579 | 3.664176  | 0.506300  |             |           |           |           |

|    |           |           |           |   |           |           |           |
|----|-----------|-----------|-----------|---|-----------|-----------|-----------|
| H  | -2.067875 | -2.699776 | -0.743682 | C | 3.810545  | 1.019136  | 0.398434  |
| H  | -4.408540 | 4.206711  | -1.449229 | O | 3.177527  | 2.237188  | 0.638087  |
| H  | -3.568437 | 2.762865  | -2.049360 | P | 1.519178  | 2.233693  | 0.530614  |
| H  | -5.251285 | 2.631852  | -1.478211 | C | 1.019161  | 2.909220  | 2.150149  |
| H  | -4.834567 | 4.729478  | 1.218399  | H | 1.511697  | 3.866588  | 2.332566  |
| H  | -4.418783 | 3.597793  | 2.523328  | H | -0.064405 | 3.046736  | 2.162753  |
| H  | -5.785523 | 3.234350  | 1.431544  | H | 1.296507  | 2.208980  | 2.939328  |
| H  | -6.214024 | -1.013386 | -0.025759 | C | 1.198153  | 3.580686  | -0.652392 |
| H  | -0.145215 | 5.079955  | -0.247061 | H | 1.704663  | 4.493316  | -0.331678 |
| H  | 2.062100  | 3.987267  | -0.614286 | H | 1.565284  | 3.291123  | -1.637252 |
| H  | 2.302081  | 1.517892  | -0.392052 | H | 0.123431  | 3.764073  | -0.714184 |
| H  | -2.069585 | 1.307327  | 2.020011  | C | -5.386004 | -1.867123 | 0.841349  |
| Si | -3.957851 | -0.549842 | 2.829911  | H | -5.949625 | -1.252356 | 0.141012  |
| C  | -2.741695 | 0.060458  | 4.148120  | H | -6.075952 | -2.297827 | 1.575416  |
| C  | -5.626293 | 0.174385  | 3.274548  | H | -4.941870 | -2.699819 | 0.289473  |
| C  | -3.955652 | -2.424487 | 2.771930  | C | -4.382763 | 0.862139  | 2.283210  |
| H  | -4.967403 | -2.789970 | 2.581233  | H | -3.437315 | 1.407958  | 2.336503  |
| H  | -3.321848 | -2.827444 | 1.982202  | H | -5.044761 | 1.392673  | 1.598767  |
| H  | -3.616205 | -2.834005 | 3.727733  | H | -4.826445 | 0.865786  | 3.284126  |
| H  | -5.765205 | -0.005441 | 4.346892  | C | -3.403555 | -1.914853 | 3.177279  |
| H  | -5.689545 | 1.252462  | 3.121078  | H | -4.199753 | -2.026444 | 3.924555  |
| H  | -6.460045 | -0.295189 | 2.751134  | H | -2.556310 | -1.432417 | 3.670308  |
| H  | -3.081499 | -0.387564 | 5.091720  | H | -3.103442 | -2.919107 | 2.868575  |
| H  | -1.708246 | -0.248530 | 3.992518  |   |           |           |           |
| H  | -2.766091 | 1.144563  | 4.274144  |   |           |           |           |

#### TS6a

|    |           |           |           |
|----|-----------|-----------|-----------|
| Si | -4.086440 | -0.893718 | 1.749050  |
| H  | -2.368514 | -1.082305 | 1.108791  |
| Ir | 1.013143  | 0.021923  | -0.008812 |
| O  | -1.136923 | 0.316316  | 0.201382  |
| C  | -2.077220 | -0.562583 | 0.062711  |
| O  | -3.374017 | -0.032854 | -0.282181 |
| Si | -3.668133 | 0.943050  | -1.685622 |
| C  | -2.683514 | 0.207178  | -3.101524 |
| H  | -1.607486 | 0.243421  | -2.912377 |
| H  | -2.966930 | -0.830937 | -3.297656 |
| H  | -2.872905 | 0.772975  | -4.018973 |
| C  | -5.511937 | 0.801380  | -1.974288 |
| H  | -5.814349 | -0.225934 | -2.193223 |
| H  | -5.798785 | 1.415522  | -2.833626 |
| H  | -6.094636 | 1.157232  | -1.120079 |
| C  | -3.163067 | 2.708939  | -1.327559 |
| H  | -2.097655 | 2.758787  | -1.094655 |
| H  | -3.356505 | 3.348830  | -2.194010 |
| H  | -3.716186 | 3.123560  | -0.480496 |
| H  | -1.861031 | -1.436237 | -0.576537 |
| H  | 1.111499  | 0.390003  | -1.498480 |
| P  | 1.316218  | -2.205820 | -0.613968 |
| C  | 0.917454  | -2.775462 | -2.300012 |
| C  | 3.023308  | -0.093586 | 0.068801  |
| H  | 1.319317  | -2.064259 | -3.022154 |
| H  | 1.356360  | -3.758833 | -2.480590 |
| H  | -0.165697 | -2.832601 | -2.428709 |
| C  | 0.767311  | -3.573718 | 0.468702  |
| H  | 1.240115  | -4.509270 | 0.162636  |
| H  | 1.047541  | -3.356175 | 1.500456  |
| H  | -0.318160 | -3.683682 | 0.410284  |
| O  | 2.967088  | -2.404944 | -0.565274 |
| C  | 3.709737  | -1.284995 | -0.199503 |
| C  | 5.090848  | -1.392333 | -0.122282 |
| H  | 5.575260  | -2.336684 | -0.333797 |
| C  | 5.823612  | -0.257639 | 0.226234  |
| H  | 6.903000  | -0.321578 | 0.290888  |
| C  | 5.194071  | 0.959030  | 0.488274  |
| H  | 5.758916  | 1.843936  | 0.751276  |

#### IM8

|    |           |           |           |
|----|-----------|-----------|-----------|
| Si | -4.994571 | -1.356975 | 0.996517  |
| H  | -2.567893 | -0.016354 | -0.544365 |
| Ir | 1.593428  | 0.014591  | -0.086078 |
| O  | -0.626551 | -0.085749 | -0.016799 |
| C  | -1.514679 | 0.093587  | -0.837053 |
| O  | -4.709703 | -0.058974 | -0.037044 |
| Si | -5.510875 | 1.219497  | -0.781616 |
| C  | -6.421500 | 0.589095  | -2.296854 |
| H  | -5.741810 | 0.094481  | -2.997102 |
| H  | -7.201698 | -0.128470 | -2.028270 |
| H  | -6.904411 | 1.412770  | -2.831952 |
| C  | -6.696649 | 2.032824  | 0.426045  |
| H  | -7.489042 | 1.348273  | 0.742530  |
| H  | -7.183234 | 2.897264  | -0.036389 |
| H  | -6.180381 | 2.385505  | 1.323439  |
| C  | -4.174843 | 2.446428  | -1.297330 |
| H  | -3.516850 | 2.031471  | -2.067853 |
| H  | -4.624621 | 3.350387  | -1.718984 |
| H  | -3.564853 | 2.755169  | -0.442403 |
| H  | -1.274961 | 0.369643  | -1.875060 |
| H  | 1.646659  | 0.304994  | -1.597595 |
| P  | 2.055383  | -2.241686 | -0.502154 |
| C  | 1.742164  | -2.981591 | -2.134969 |
| C  | 3.585685  | 0.044567  | 0.089647  |
| H  | 2.130630  | -2.323624 | -2.912658 |
| H  | 2.232852  | -3.954439 | -2.206145 |
| H  | 0.666829  | -3.109402 | -2.279649 |
| C  | 1.515750  | -3.497315 | 0.704370  |
| H  | 1.994517  | -4.455846 | 0.493414  |
| H  | 1.785062  | -3.177060 | 1.711821  |
| H  | 0.430569  | -3.612017 | 0.650413  |
| O  | 3.710876  | -2.309617 | -0.384676 |
| C  | 4.355083  | -1.120319 | -0.062705 |
| C  | 5.734005  | -1.125989 | 0.085141  |
| H  | 6.287589  | -2.048017 | -0.034389 |
| C  | 6.374362  | 0.077237  | 0.381513  |
| H  | 7.451035  | 0.088849  | 0.499134  |
| C  | 5.660023  | 1.266788  | 0.524697  |
| H  | 6.156086  | 2.202464  | 0.746708  |
| C  | 4.282438  | 1.231279  | 0.369220  |
| O  | 3.563744  | 2.416121  | 0.484274  |

|   |           |           |           |    |           |           |           |
|---|-----------|-----------|-----------|----|-----------|-----------|-----------|
| P | 1.912718  | 2.289444  | 0.355271  | H  | -2.477026 | 2.444599  | 0.175773  |
| C | 1.335031  | 2.978219  | 1.941874  | H  | -2.028719 | 0.620143  | -2.318147 |
| H | 1.754231  | 3.974528  | 2.097174  | H  | -0.559699 | -0.063744 | -1.610861 |
| H | 0.244193  | 3.038697  | 1.939300  | H  | -1.861237 | -1.141092 | -2.115293 |
| H | 1.648322  | 2.327367  | 2.759436  | O  | -6.095725 | -0.382821 | -1.368352 |
| C | 1.514401  | 3.555630  | -0.889422 | Si | -7.363557 | 0.074295  | -0.154013 |
| H | 1.940222  | 4.517646  | -0.597023 | C  | -8.908551 | -0.313212 | -1.111665 |
| H | 1.925209  | 3.257377  | -1.854269 | C  | -7.083380 | -1.026573 | 1.323085  |
| H | 0.429957  | 3.654250  | -0.978671 | C  | -7.092060 | 1.890375  | 0.171092  |
| C | -5.117842 | -0.730668 | 2.762760  | H  | -7.886894 | -0.865565 | 2.050434  |
| H | -4.220205 | -0.177390 | 3.054570  | H  | -7.099806 | -2.082922 | 1.049748  |
| H | -5.234981 | -1.563509 | 3.463262  | H  | -6.138689 | -0.810853 | 1.825811  |
| H | -5.976408 | -0.067220 | 2.898045  | H  | -7.868517 | 2.255788  | 0.849954  |
| C | -3.507874 | -2.502427 | 0.825852  | H  | -6.126340 | 2.080701  | 0.645076  |
| H | -2.580834 | -2.006025 | 1.129531  | H  | -7.152975 | 2.479572  | -0.744923 |
| H | -3.630296 | -3.383463 | 1.463178  | H  | -9.792200 | -0.078581 | -0.509922 |
| H | -3.392957 | -2.856815 | -0.203360 | H  | -8.967486 | 0.271753  | -2.032009 |
| C | -6.564531 | -2.255145 | 0.492891  | H  | -8.959976 | -1.373079 | -1.375730 |
| H | -6.728388 | -3.129056 | 1.131201  | H  | -4.314664 | -0.703800 | -2.215107 |
| H | -6.513908 | -2.607382 | -0.541252 |    |           |           |           |
| H | -7.448540 | -1.617653 | 0.586792  |    |           |           |           |

#### TS8b-syn

|             |           |           |           |    |           |           |           |
|-------------|-----------|-----------|-----------|----|-----------|-----------|-----------|
| <b>TS8b</b> |           |           |           | Ir | -1.068580 | 0.510431  | 0.025175  |
| C           | 4.264360  | 1.195673  | -0.742900 | Si | 1.604365  | 2.770781  | 0.137844  |
| C           | 3.593029  | 0.000727  | -0.443125 | C  | 3.458570  | 3.221381  | 0.149233  |
| C           | 4.256781  | -1.200641 | -0.733918 | C  | -2.353747 | -1.077445 | 0.013043  |
| C           | 5.517200  | -1.229850 | -1.319148 | C  | -2.909447 | -1.562968 | -1.178571 |
| C           | 6.134174  | -0.011711 | -1.610191 | C  | -3.755818 | -2.662801 | -1.215196 |
| C           | 5.525000  | 1.212420  | -1.328218 | C  | -4.068184 | -3.294941 | -0.010802 |
| Ir          | 1.710308  | 0.010044  | 0.391903  | C  | -3.555858 | -2.843268 | 1.206045  |
| P           | 2.135637  | -2.252477 | 0.337899  | C  | -2.713367 | -1.739551 | 1.195025  |
| C           | 2.423968  | -3.146345 | 1.907061  | O  | -2.603647 | -0.908414 | -2.365863 |
| O           | 3.637920  | -2.395579 | -0.412301 | P  | -1.587416 | 0.412480  | -2.232524 |
| O           | 3.653226  | 2.396821  | -0.430586 | C  | -2.583903 | 1.737465  | -2.991364 |
| P           | 2.150077  | 2.269096  | 0.320545  | O  | -2.212175 | -1.263503 | 2.399984  |
| C           | 2.443722  | 3.174687  | 1.880860  | P  | -1.216962 | 0.076994  | 2.302472  |
| C           | 1.200521  | 3.456347  | -0.698355 | C  | 0.228433  | -0.502704 | 3.258340  |
| C           | 1.180815  | -3.444347 | -0.669045 | O  | 2.132400  | 0.816595  | 0.348075  |
| C           | -1.647403 | -0.167398 | -1.660686 | C  | 3.107776  | 0.197182  | -0.102040 |
| Si          | -2.335711 | -0.028655 | 0.070056  | O  | 3.296175  | -1.040079 | 0.180021  |
| O           | -4.186327 | -0.058146 | -0.281028 | C  | 0.963752  | 3.453716  | 1.765080  |
| C           | -2.291386 | -1.531831 | 1.175687  | C  | 1.023837  | 3.540772  | -1.484809 |
| C           | -2.307559 | 1.638992  | 0.899059  | C  | -0.344645 | 0.001068  | -3.510880 |
| C           | -4.833694 | -0.388456 | -1.303190 | C  | -2.060304 | 1.249356  | 3.415297  |
| H           | 0.088319  | 0.018971  | 0.642275  | H  | -4.163227 | -3.007413 | -2.156772 |
| H           | 1.338936  | 0.018474  | 1.905542  | H  | -3.808321 | -3.327800 | 2.140269  |
| H           | 1.047048  | -3.042405 | -1.675649 | H  | -4.729101 | -4.153477 | -0.020261 |
| H           | 1.711144  | -4.398264 | -0.734901 | H  | 0.110105  | 1.774829  | 0.022553  |
| H           | 3.096479  | -2.557926 | 2.531827  | H  | -2.095363 | 1.645405  | 0.180299  |
| H           | 2.866955  | -4.125718 | 1.711687  | H  | -3.433405 | 1.960328  | -2.345428 |
| H           | 1.477031  | -3.269519 | 2.432930  | H  | -1.976663 | 2.638508  | -3.099317 |
| H           | 0.201229  | -3.605318 | -0.214267 | H  | -2.947715 | 1.422353  | -3.971301 |
| H           | 1.735191  | 4.402777  | -0.779703 | H  | 0.245829  | -0.855141 | -3.181790 |
| H           | 1.056377  | 3.038207  | -1.696891 | H  | -0.840762 | -0.250303 | -4.450571 |
| H           | 0.223798  | 3.629605  | -0.242128 | H  | 0.317038  | 0.855259  | -3.669316 |
| H           | 2.888882  | 4.149148  | 1.678884  | H  | -0.097565 | -0.926534 | 4.210332  |
| H           | 3.113156  | 2.588278  | 2.508013  | H  | 0.905144  | 0.333700  | 3.443213  |
| H           | 1.495449  | 3.303282  | 2.407807  | H  | 0.760510  | -1.262663 | 2.685511  |
| H           | 6.017242  | 2.151008  | -1.546886 | H  | 1.196689  | 2.767562  | 2.584174  |
| H           | 7.118511  | -0.016533 | -2.066647 | H  | 1.458165  | 4.403533  | 1.989769  |
| H           | 6.003452  | -2.173136 | -1.530902 | H  | -0.115485 | 3.606056  | 1.739119  |
| H           | -3.046523 | -1.446382 | 1.964585  | H  | 1.226344  | 2.870385  | -2.325828 |
| H           | -2.493165 | -2.444715 | 0.606531  | H  | 1.564983  | 4.472522  | -1.675047 |
| H           | -1.310895 | -1.622444 | 1.644543  | H  | -0.048630 | 3.738303  | -1.461743 |
| H           | -3.089338 | 1.698668  | 1.663945  | H  | 4.003482  | 2.836310  | 1.016049  |
| H           | -1.341942 | 1.802657  | 1.380824  | H  | 4.000889  | 2.932386  | -0.757315 |
|             |           |           |           | H  | 3.518861  | 4.314084  | 0.196469  |

|    |           |           |           |   |           |           |           |
|----|-----------|-----------|-----------|---|-----------|-----------|-----------|
| H  | -1.436916 | 2.133721  | 3.560362  | H | -3.093895 | 0.762040  | -2.384949 |
| H  | -3.005508 | 1.553903  | 2.965216  | H | -1.433764 | 1.096641  | -1.908051 |
| H  | -2.255414 | 0.777386  | 4.380271  | H | -2.750702 | 1.893527  | -1.051909 |
| H  | 3.831277  | 0.691639  | -0.759195 | H | -0.390954 | -0.068451 | 1.007343  |
| Si | 4.593346  | -2.182203 | -0.257171 | H | -1.775759 | 0.778362  | 1.725261  |
| C  | 5.267714  | -2.716186 | 1.392392  | H | -1.587445 | -0.968186 | 1.962832  |
| C  | 3.697053  | -3.519679 | -1.190572 | H | -5.189146 | 0.735627  | -0.712724 |
| C  | 5.826537  | -1.238834 | -1.298810 | H | -9.959374 | -1.134875 | 0.037843  |
| H  | 6.048311  | -3.470207 | 1.251499  | H | -8.600346 | -1.728100 | -0.918351 |
| H  | 5.711467  | -1.880953 | 1.940364  | H | -8.725650 | -2.140782 | 0.800379  |
| H  | 4.488664  | -3.160262 | 2.016930  | H | -8.997189 | 1.893625  | -0.889404 |
| H  | 4.392508  | -4.322663 | -1.453731 | H | -7.346982 | 2.379446  | -0.543800 |
| H  | 2.898042  | -3.959572 | -0.588588 | H | -7.684051 | 1.146444  | -1.781886 |
| H  | 3.260095  | -3.146163 | -2.120343 | H | -9.287281 | 1.154610  | 2.339653  |
| H  | 6.644548  | -1.914398 | -1.569357 | H | -8.086919 | 0.032467  | 2.984156  |
| H  | 5.400306  | -0.870131 | -2.236010 | H | -7.604791 | 1.664278  | 2.488984  |
| H  | 6.276797  | -0.398022 | -0.763778 |   |           |           |           |

**(POCOP)IrH<sub>2</sub>+[HC(OSiMe<sub>3</sub>)<sub>2</sub>]<sup>+</sup>**

|          |           |           |           |
|----------|-----------|-----------|-----------|
| C        | 4.843527  | -0.735025 | 2.594483  |
| C        | 3.975060  | -0.884373 | 1.519442  |
| C        | 3.386894  | 0.214590  | 0.875193  |
| C        | 3.728025  | 1.494384  | 1.338147  |
| C        | 4.591788  | 1.689114  |           |
| 2.409455 |           |           |           |
| C        | 5.135735  | 0.560346  | 3.025754  |
| Ir       | 2.067824  | -0.041559 | -0.691993 |
| P        | 2.678545  | -2.221973 | -0.295208 |
| C        | 1.544133  | -3.554446 | 0.241606  |
| O        | 3.682926  | -2.156054 | 1.060967  |
| O        | 3.188233  | 2.596107  | 0.698440  |
| P        | 2.225110  | 2.248956  | -0.644904 |
| C        | 3.155041  | 3.074894  | -1.984407 |
| C        | 0.841154  | 3.403071  | -0.318069 |
| C        | 3.762850  | -3.047509 | -1.512191 |
| C        | -1.458604 | -0.152247 | 1.247516  |
| Si       | -2.378871 | -0.476590 | -0.327293 |
| O        | -4.099514 | -0.662990 | 0.287293  |
| C        | -2.448434 | 0.953967  | -1.523062 |
| C        | -2.100311 | -2.129649 | -1.125205 |
| C        | -5.175199 | -0.073179 | 0.026942  |
| O        | -6.247357 | -0.401558 | 0.609197  |
| Si       | -7.950613 | 0.191073  | 0.518840  |
| C        | -8.886154 | -1.348033 | 0.065687  |
| C        | -8.250489 | 0.817682  | 2.242071  |
| C        | -7.972731 | 1.518372  | -0.794751 |
| H        | 5.282743  | -1.600855 | 3.072694  |
| H        | 5.812914  | 0.694435  | 3.861711  |
| H        | 4.837561  | 2.688164  | 2.745271  |
| H        | 1.222569  | 4.406684  | -0.118992 |
| H        | 0.182152  | 3.431199  | -1.188708 |
| H        | 0.277869  | 3.055955  | 0.548504  |
| H        | 4.084068  | 2.531204  | -2.155613 |
| H        | 2.563920  | 3.049594  | -2.902496 |
| H        | 3.379960  | 4.109542  | -1.717885 |
| H        | 4.567071  | -2.364849 | -1.786427 |
| H        | 3.185188  | -3.282030 | -2.408948 |
| H        | 4.185232  | -3.963605 | -1.094700 |
| H        | 2.112481  | -4.417113 | 0.595295  |
| H        | 0.914954  | -3.854410 | -0.599180 |
| H        | 0.911007  | -3.186641 | 1.049346  |
| H        | 0.635793  | -0.243314 | -1.424297 |
| H        | 2.043616  | -0.170046 | -2.263407 |
| H        | -1.074544 | -2.160227 | -1.503019 |
| H        | -2.775313 | -2.296696 | -1.968516 |
| H        | -2.227481 | -2.946902 | -0.411387 |

**IM9b**

|    |           |           |           |
|----|-----------|-----------|-----------|
| Ir | 0.671412  | -1.132972 | 0.264222  |
| Si | -4.286542 | -1.201268 | 0.004911  |
| C  | -6.095765 | -0.816398 | -0.170949 |
| C  | 2.200595  | 0.227080  | 0.012924  |
| C  | 2.912759  | 0.304920  | -1.195186 |
| C  | 3.946936  | 1.215114  | -1.385222 |
| C  | 4.279442  | 2.060676  | -0.324874 |
| C  | 3.614689  | 2.012749  | 0.903314  |
| C  | 2.587026  | 1.088650  | 1.051540  |
| O  | 2.566075  | -0.547003 | -2.225509 |
| P  | 1.364303  | -1.679813 | -1.862943 |
| C  | 2.267573  | -3.252651 | -2.074167 |
| O  | 1.913224  | 1.012860  | 2.258862  |
| P  | 0.845379  | -0.293552 | 2.401286  |
| C  | -0.466191 | 0.502018  | 3.398144  |
| O  | -3.578966 | 0.454284  | -0.081052 |
| C  | -2.448168 | 0.985943  | -0.274724 |
| O  | -2.380631 | 2.245768  | -0.335831 |
| C  | -3.798429 | -1.849007 | 1.680353  |
| C  | -3.564440 | -2.141683 | -1.432727 |
| C  | 0.352612  | -1.554091 | -3.381101 |
| C  | 1.704836  | -1.355546 | 3.615702  |
| H  | 4.482201  | 1.253127  | -2.325030 |
| H  | 3.898409  | 2.660513  | 1.722636  |
| H  | 5.088917  | 2.770013  | -0.454884 |
| H  | -0.852778 | -1.649512 | 0.234687  |
| H  | 0.292528  | -2.612000 | 0.692849  |
| H  | 3.005082  | -3.349800 | -1.277421 |
| H  | 1.563656  | -4.084330 | -1.999526 |
| H  | 2.769229  | -3.279889 | -3.043430 |
| H  | -0.151656 | -0.587911 | -3.408685 |
| H  | 0.984017  | -1.654080 | -4.266278 |
| H  | -0.397521 | -2.347881 | -3.380132 |
| H  | -0.030262 | 1.001645  | 4.265670  |
| H  | -1.168298 | -0.262534 | 3.737782  |
| H  | -1.004300 | 1.236433  | 2.798867  |
| H  | -4.151814 | -1.194435 | 2.481260  |
| H  | -4.251292 | -2.833319 | 1.837166  |
| H  | -2.715417 | -1.965229 | 1.764248  |
| H  | -3.794086 | -1.661941 | -2.387971 |
| H  | -3.998748 | -3.146381 | -1.460269 |
| H  | -2.481784 | -2.253611 | -1.338190 |
| H  | -6.445557 | -0.162295 | 0.631428  |
| H  | -6.313675 | -0.332091 | -1.126030 |
| H  | -6.681703 | -1.739728 | -0.126303 |
| H  | 1.055973  | -2.192580 | 3.882405  |
| H  | 2.612644  | -1.752928 | 3.162021  |
| H  | 1.960620  | -0.786547 | 4.511663  |



|    |           |          |           |          |           |          |           |
|----|-----------|----------|-----------|----------|-----------|----------|-----------|
| H  | -1.539985 | 0.360220 | -0.356707 | C        | 3.577421  | 3.878654 | -1.773387 |
| Si | -1.165864 | 3.523256 | -0.728126 | C        | 0.543520  | 3.298790 | -1.316114 |
| C  | -2.276654 | 4.864411 | -1.378515 | C        | 2.476509  | 3.498010 |           |
| C  | -0.361666 | 3.926768 | 0.900422  | 1.117698 |           |          |           |
| C  | -0.025726 | 2.788451 | -2.001451 | H        | 3.429473  | 4.962711 | -1.798777 |
| H  | -1.682834 | 5.742723 | -1.650121 | H        | 4.588247  | 3.690079 | -1.403128 |
| H  | -2.818398 | 4.542730 | -2.271435 | H        | 3.518398  | 3.512363 | -2.801372 |
| H  | -3.007662 | 5.176535 | -0.628755 | H        | 0.204332  | 4.324019 | -1.138500 |
| H  | 0.296594  | 4.791404 | 0.765997  | H        | 0.475188  | 3.111722 | -2.390116 |
| H  | -1.101709 | 4.197027 | 1.658137  | H        | -0.147243 | 2.622028 | -0.803829 |
| H  | 0.255512  | 3.109506 | 1.280283  | H        | 2.303191  | 4.570337 | 1.253838  |
| H  | 0.692719  | 3.551785 | -2.317535 | H        | 1.751989  | 2.975892 | 1.748069  |
| H  | 0.551845  | 1.952107 | -1.600900 | H        | 3.482624  | 3.290321 | 1.493027  |
| H  | -0.564927 | 2.463076 | -2.895404 |          |           |          |           |

### TS10b

|    |           |           |           |
|----|-----------|-----------|-----------|
| Ir | -0.694178 | -0.243575 | 0.160426  |
| Si | 3.833796  | -2.067146 | 0.584595  |
| C  | 5.631140  | -2.186813 | 0.112906  |
| C  | -2.708626 | -0.146308 | -0.183665 |
| C  | -3.607390 | 0.238045  | 0.824789  |
| C  | -4.970333 | 0.366413  | 0.595632  |
| C  | -5.451074 | 0.087699  | -0.685237 |
| C  | -4.604944 | -0.315525 | -1.719814 |
| C  | -3.248358 | -0.431631 | -1.448802 |
| O  | -3.110525 | 0.485938  | 2.093889  |
| P  | -1.453759 | 0.292471  | 2.278806  |
| C  | -1.372750 | -0.969271 | 3.595134  |
| O  | -2.394684 | -0.853802 | -2.454764 |
| P  | -0.777114 | -0.991556 | -2.029690 |
| C  | 0.014360  | -0.108091 | -3.417873 |
| O  | 3.256283  | -0.688537 | -0.361880 |
| C  | 2.724167  | 0.421344  | 0.004942  |
| O  | 2.642198  | 1.356600  | -0.872406 |
| C  | 2.809438  | -3.507010 | -0.001419 |
| C  | 3.565132  | -1.653608 | 2.389239  |
| C  | -1.045188 | 1.851759  | 3.142510  |
| C  | -0.451264 | -2.751416 | -2.383312 |
| H  | -5.634909 | 0.667378  | 1.394882  |
| H  | -4.987599 | -0.540381 | -2.706758 |
| H  | -6.512777 | 0.182290  | -0.880741 |
| H  | 0.981572  | -0.044235 | 0.311672  |
| H  | -0.183948 | -1.613887 | 0.660959  |
| H  | -1.722070 | -1.922781 | 3.198750  |
| H  | -0.340068 | -1.083081 | 3.932033  |
| H  | -2.000141 | -0.675159 | 4.438761  |
| H  | -1.164451 | 2.692559  | 2.458501  |
| H  | -1.706853 | 1.993431  | 3.999547  |
| H  | -0.009775 | 1.815661  | 3.488743  |
| H  | -0.294452 | -0.540864 | -4.371478 |
| H  | 1.099509  | -0.176147 | -3.314604 |
| H  | -0.278519 | 0.941477  | -3.390734 |
| H  | 2.949185  | -3.682647 | -1.071089 |
| H  | 3.110873  | -4.419153 | 0.522762  |
| H  | 1.746220  | -3.346647 | 0.190189  |
| H  | 4.147136  | -0.787149 | 2.715980  |
| H  | 3.891006  | -2.501052 | 3.000694  |
| H  | 2.510538  | -1.477365 | 2.617102  |
| H  | 5.751476  | -2.304818 | -0.966926 |
| H  | 6.193793  | -1.302358 | 0.422715  |
| H  | 6.089824  | -3.056134 | 0.594291  |
| H  | 0.619214  | -2.947523 | -2.298463 |
| H  | -0.984046 | -3.369457 | -1.660517 |
| H  | -0.788814 | -2.999641 | -3.391388 |
| H  | 2.691924  | 0.674724  | 1.062135  |
| Si | 2.287488  | 3.079805  | -0.696295 |

### IM10

|    |           |           |           |
|----|-----------|-----------|-----------|
| Ir | 0.797426  | -0.002000 | -0.300473 |
| Si | -4.403979 | -0.934162 | -1.192957 |
| C  | -4.351012 | -2.493967 | -2.220580 |
| C  | 2.673186  | -0.563347 | 0.118840  |
| C  | 3.771402  | 0.208261  | -0.279885 |
| C  | 5.073962  | -0.155052 | 0.031446  |
| C  | 5.281650  | -1.334934 | 0.745573  |
| C  | 4.218359  | -2.148009 | 1.136985  |
| C  | 2.927436  | -1.756550 | 0.809510  |
| O  | 3.548604  | 1.366330  | -1.013590 |
| P  | 1.965010  | 1.713347  | -1.395195 |
| C  | 1.972312  | 1.734337  | -3.216164 |
| O  | 1.863228  | -2.571666 | 1.171840  |
| P  | 0.344854  | -2.050780 | 0.728009  |
| C  | -0.585827 | -2.173602 | 2.286189  |
| O  | -2.749436 | -0.652502 | -0.804829 |
| C  | -2.203055 | 0.519994  | -0.368526 |
| O  | -2.400370 | 0.709085  | 0.987372  |
| C  | -5.038101 | 0.536578  | -2.172683 |
| C  | -5.372737 | -1.169975 | 0.391854  |
| C  | 1.855344  | 3.469448  | -0.917218 |
| C  | -0.292651 | -3.393922 | -0.316248 |
| H  | 5.898920  | 0.469561  | -0.285405 |
| H  | 4.379744  | -3.070492 | 1.679303  |
| H  | 6.293205  | -1.630895 | 0.995120  |
| H  | -1.071640 | 0.453138  | -0.615604 |
| H  | 0.795830  | -0.764151 | -1.640165 |
| H  | 2.176156  | 0.730622  | -3.589821 |
| H  | 0.992850  | 2.052791  | -3.580898 |
| H  | 2.737416  | 2.420905  | -3.583840 |
| H  | 1.934590  | 3.566091  | 0.165955  |
| H  | 2.664882  | 4.033020  | -1.385824 |
| H  | 0.896537  | 3.879129  | -1.243516 |
| H  | -0.576012 | -3.203000 | 2.650062  |
| H  | -1.612954 | -1.849002 | 2.108060  |
| H  | -0.131925 | -1.526383 | 3.037031  |
| H  | -4.440246 | 0.718379  | -3.070362 |
| H  | -6.064008 | 0.342785  | -2.501093 |
| H  | -5.064296 | 1.458740  | -1.584828 |
| H  | -4.988121 | -2.014399 | 0.970341  |
| H  | -6.425817 | -1.372158 | 0.172890  |
| H  | -5.326917 | -0.281410 | 1.026140  |
| H  | -3.745825 | -2.361850 | -3.121189 |
| H  | -3.939622 | -3.334345 | -1.654428 |
| H  | -5.359008 | -2.778844 | -2.536530 |
| H  | -1.306257 | -3.132150 | -0.627697 |
| H  | 0.334531  | -3.493121 | -1.202521 |
| H  | -0.300707 | -4.337623 | 0.232456  |
| H  | -2.538129 | 1.389579  | -0.951959 |
| Si | -1.893930 | 1.994300  | 1.979894  |
| C  | -2.882366 | 1.820221  | 3.550266  |



|   |           |           |           |   |           |           |          |
|---|-----------|-----------|-----------|---|-----------|-----------|----------|
| H | -5.471980 | 0.735237  | -2.243640 | H | -4.829859 | 0.483532  | 3.435932 |
| H | -6.455108 | -0.702221 | -1.914441 | H | -3.706857 | 1.480651  | 2.525360 |
| H | -8.433577 | 0.463249  | 0.824530  | H | -5.369052 | 1.226486  | 1.942584 |
| H | -7.801403 | -1.171551 | 0.842843  | H | -2.424409 | -1.274601 | 3.500571 |
| H | -7.478581 | -0.060394 | 2.197170  | H | -2.157144 | -2.474470 | 2.224583 |
| H | -6.647210 | 2.872290  | 0.767559  | H | -1.493569 | -0.840476 | 2.061333 |
| H | -5.348916 | 2.295225  | 1.805327  |   |           |           |          |
| H | -4.999932 | 2.824515  | 0.147833  |   |           |           |          |

### IM9bi

|    |           |           |           |
|----|-----------|-----------|-----------|
| C  | 3.078393  | -0.045311 | 0.257652  |
| C  | 3.760333  | -1.272776 | 0.226748  |
| C  | 5.090802  | -1.393852 | 0.607823  |
| C  | 5.761581  | -0.243027 | 1.024781  |
| C  | 5.138278  | 1.005794  | 1.060194  |
| C  | 3.807578  | 1.081981  | 0.670291  |
| O  | 3.083914  | -2.393863 | -0.212757 |
| P  | 1.479080  | -2.146169 | -0.663073 |
| C  | 0.688578  | -3.489906 | 0.291173  |
| O  | 3.177583  | 2.313231  | 0.672132  |
| P  | 1.572653  | 2.304795  | 0.165209  |
| C  | 1.628568  | 3.517954  | -1.200029 |
| Ir | 1.089599  | 0.096289  | -0.270479 |
| C  | 1.497238  | -2.773986 | -2.378985 |
| C  | 0.814853  | 3.237177  | 1.546829  |
| O  | -2.580161 | -2.417291 | -0.410499 |
| C  | -2.612833 | -1.299862 | -0.793763 |
| O  | -3.451690 | -0.337643 | -0.140840 |
| Si | -3.990214 | 1.173930  | -1.095252 |
| C  | -3.313462 | 0.938775  | -2.817813 |
| Si | -3.934186 | -0.837988 | 1.635890  |
| C  | -2.351120 | -1.419772 | 2.417906  |
| C  | -5.291256 | -2.088662 | 1.414482  |
| C  | -4.512334 | 0.751827  | 2.421097  |
| C  | -5.850216 | 1.081384  | -1.074568 |
| C  | -3.216021 | 2.631288  | -0.239604 |
| H  | 0.454900  | 0.369813  | -1.671786 |
| H  | -0.547333 | 0.157759  | -0.163905 |
| H  | -2.069097 | -0.855437 | -1.622428 |
| H  | 6.800294  | -0.320210 | 1.324967  |
| H  | 5.671595  | 1.893802  | 1.373292  |
| H  | 5.587536  | -2.354590 | 0.572033  |
| H  | 1.207337  | -4.433769 | 0.111475  |
| H  | -0.358010 | -3.581646 | -0.003621 |
| H  | 0.740826  | -3.249013 | 1.353504  |
| H  | 1.364242  | 4.163683  | 1.725760  |
| H  | -0.224356 | 3.472151  | 1.306981  |
| H  | 0.840063  | 2.625456  | 2.449167  |
| H  | 2.040234  | -2.070044 | -3.009724 |
| H  | 1.982514  | -3.750997 | -2.420770 |
| H  | 0.473024  | -2.862548 | -2.748191 |
| H  | 2.133666  | 4.430450  | -0.877207 |
| H  | 0.611836  | 3.756917  | -1.519629 |
| H  | 2.167126  | 3.082093  | -2.041558 |
| H  | -6.237633 | 1.905352  | -1.683913 |
| H  | -6.211005 | 0.152126  | -1.523085 |
| H  | -6.291667 | 1.182524  | -0.082510 |
| H  | -3.260828 | 3.491094  | -0.916547 |
| H  | -3.715427 | 2.916192  | 0.686433  |
| H  | -2.162684 | 2.426540  | -0.031153 |
| H  | -3.694372 | 1.772037  | -3.419306 |
| H  | -2.222899 | 0.989338  | -2.862209 |
| H  | -3.652310 | 0.021334  | -3.305417 |
| H  | -5.638543 | -2.412773 | 2.401406  |
| H  | -6.153125 | -1.674185 | 0.885833  |
| H  | -4.939509 | -2.970998 | 0.878050  |

### TS10bi

|    |           |           |           |
|----|-----------|-----------|-----------|
| C  | -3.018112 | 0.125204  | -0.124480 |
| C  | -3.839294 | -1.005174 | 0.001844  |
| C  | -5.214855 | -0.949181 | -0.178693 |
| C  | -5.790462 | 0.284880  | -0.484643 |
| C  | -5.021893 | 1.444060  | -0.604836 |
| C  | -3.650641 | 1.342309  | -0.416054 |
| O  | -3.252357 | -2.218306 | 0.334970  |
| P  | -1.586236 | -2.210815 | 0.485575  |
| C  | -1.101663 | -3.497752 | -0.713778 |
| O  | -2.869767 | 2.487789  | -0.503868 |
| P  | -1.226328 | 2.269086  | -0.278280 |
| C  | -0.884150 | 3.483209  | 1.041293  |
| Ir | -0.986945 | -0.001684 | 0.106417  |
| C  | -1.358859 | -2.994376 | 2.115284  |
| C  | -0.577350 | 3.060284  | -1.795077 |
| O  | 2.009305  | -2.288947 | 0.265494  |
| C  | 2.065250  | -1.195110 | 0.726120  |
| O  | 3.171023  | -0.276178 | 0.167788  |
| Si | 3.827972  | 1.056199  | 1.213693  |
| C  | 2.902805  | 0.972553  | 2.837418  |
| Si | 3.795422  | -0.838858 | -1.481486 |
| C  | 2.297640  | -1.200885 | -2.530339 |
| C  | 4.925405  | -2.278988 | -1.138407 |
| C  | 4.720255  | 0.628044  | -2.182111 |
| C  | 5.634278  | 0.664264  | 1.468287  |
| C  | 3.484662  | 2.669687  | 0.342603  |
| H  | -0.818956 | 0.249322  | 1.617994  |
| H  | 0.724385  | -0.172036 | 0.134973  |
| H  | 1.818839  | -0.845169 | 1.718688  |
| H  | -6.862748 | 0.345763  | -0.628147 |
| H  | -5.474153 | 2.400703  | -0.831674 |
| H  | -5.816424 | -1.842885 | -0.075921 |
| H  | -1.638933 | -4.426847 | -0.512780 |
| H  | -0.026032 | -3.664451 | -0.634262 |
| H  | -1.337769 | -3.159552 | -1.723708 |
| H  | -1.007158 | 4.056939  | -1.914434 |
| H  | 0.510454  | 3.137859  | -1.737402 |
| H  | -0.840870 | 2.453712  | -2.662646 |
| H  | -1.687587 | -2.310145 | 2.897715  |
| H  | -1.942081 | -3.915613 | 2.172261  |
| H  | -0.301564 | -3.227768 | 2.257939  |
| H  | -1.291269 | 4.459534  | 0.771087  |
| H  | 0.193534  | 3.568781  | 1.195649  |
| H  | -1.348208 | 3.143701  | 1.967653  |
| H  | 6.056570  | 1.407525  | 2.153124  |
| H  | 5.767570  | -0.316149 | 1.933339  |
| H  | 6.230169  | 0.694613  | 0.554993  |
| H  | 3.622074  | 3.488466  | 1.056416  |
| H  | 4.145468  | 2.859587  | -0.503294 |
| H  | 2.450830  | 2.707134  | -0.008608 |
| H  | 3.281181  | 1.792928  | 3.457423  |
| H  | 1.825615  | 1.124752  | 2.734157  |
| H  | 3.082533  | 0.051602  | 3.397720  |
| H  | 5.332318  | -2.647533 | -2.086038 |
| H  | 5.772922  | -1.996911 | -0.508599 |
| H  | 4.392345  | -3.101703 | -0.660207 |
| H  | 5.145573  | 0.291610  | -3.134820 |
| H  | 4.063169  | 1.469900  | -2.408734 |

|   |          |           |           |
|---|----------|-----------|-----------|
| H | 5.555111 | 0.982321  | -1.576531 |
| H | 2.553286 | -1.046828 | -3.583173 |
| H | 1.949367 | -2.225388 | -2.403875 |
| H | 1.472424 | -0.527973 | -2.282373 |

|   |           |           |          |
|---|-----------|-----------|----------|
| H | -0.251157 | -1.253614 | 1.935018 |
| H | -0.655101 | -0.858567 | 0.226996 |
| H | -0.730199 | 0.397259  | 1.529323 |

**IM10bi**

|          |           |           |           |
|----------|-----------|-----------|-----------|
| C        | 2.100459  | 0.904599  | 0.825011  |
| C        | 2.988323  | 0.262165  | 1.696241  |
| C        | 3.556102  | 0.921900  | 2.777613  |
| C        | 3.233754  | 2.262840  | 2.983687  |
| C        | 2.362114  | 2.942677  |           |
| 2.133345 |           |           |           |
| C        | 1.812566  | 2.253133  | 1.061549  |
| O        | 3.302040  | -1.073795 | 1.482266  |
| P        | 2.646739  | -1.787730 | 0.130767  |
| C        | 1.997493  | -3.362109 | 0.767342  |
| O        | 0.938056  | 2.915715  | 0.209060  |
| P        | 0.364541  | 2.055823  | -1.094541 |
| C        | 0.997945  | 3.004254  | -2.515136 |
| Ir       | 1.248763  | -0.086246 | -0.698139 |
| C        | 4.101178  | -2.248040 | -0.858395 |
| C        | -1.417552 | 2.413389  | -1.056050 |
| O        | 1.288921  | -2.569774 | -2.914525 |
| C        | 0.840892  | -1.465488 | -2.901277 |
| O        | -3.568458 | -0.190135 | 0.437034  |
| Si       | -5.038000 | 0.205883  | -0.281445 |
| C        | -4.822550 | -0.006533 | -2.136883 |
| Si       | -2.735882 | -1.109892 | 1.533634  |
| C        | -0.898505 | -0.653718 | 1.293529  |
| C        | -2.963682 | -2.939786 | 1.184414  |
| C        | -3.220962 | -0.679531 | 3.291790  |
| C        | -6.391369 | -0.929392 | 0.356548  |
| C        | -5.419162 | 1.993203  | 0.146240  |
| H        | 2.424964  | 0.324785  | -1.616263 |
| H        | 0.231107  | -1.079494 | -1.971770 |
| H        | 0.784755  | -0.797611 | -3.773623 |
| H        | 3.671512  | 2.789096  | 3.823018  |
| H        | 2.111890  | 3.983615  | 2.291021  |
| H        | 4.234704  | 0.393960  | 3.434773  |
| H        | 2.787309  | -3.912031 | 1.283376  |
| H        | 1.634409  | -3.953689 | -0.076383 |
| H        | 1.173715  | -3.180491 | 1.456622  |
| H        | -1.572696 | 3.483041  | -0.898551 |
| H        | -1.854612 | 2.125268  | -2.015288 |
| H        | -1.910619 | 1.843636  | -0.268696 |
| H        | 4.631876  | -1.347217 | -1.167312 |
| H        | 4.770637  | -2.879206 | -0.270668 |
| H        | 3.772287  | -2.792428 | -1.745983 |
| H        | 0.679268  | 4.046124  | -2.442196 |
| H        | 0.616126  | 2.577180  | -3.445667 |
| H        | 2.087295  | 2.960042  | -2.526358 |
| H        | -7.352777 | -0.664003 | -0.094373 |
| H        | -6.197818 | -1.977788 | 0.111946  |
| H        | -6.511998 | -0.850996 | 1.441094  |
| H        | -6.360913 | 2.311450  | -0.311439 |
| H        | -5.516605 | 2.131257  | 1.226852  |
| H        | -4.637674 | 2.672254  | -0.207041 |
| H        | -5.743903 | 0.247695  | -2.669621 |
| H        | -4.031420 | 0.640671  | -2.527416 |
| H        | -4.570018 | -1.039776 | -2.392666 |
| H        | -2.368674 | -3.553087 | 1.868448  |
| H        | -4.008639 | -3.235156 | 1.314226  |
| H        | -2.674210 | -3.199197 | 0.161656  |
| H        | -2.621550 | -1.236936 | 4.017959  |
| H        | -3.086897 | 0.386520  | 3.494823  |
| H        | -4.270684 | -0.924351 | 3.478745  |

**TS11b**

|    |           |           |           |
|----|-----------|-----------|-----------|
| Ir | 2.212555  | -0.024842 | 0.203597  |
| Si | -1.662930 | 0.704196  | -0.078737 |
| C  | -1.281948 | 2.276485  | 0.861143  |
| C  | 4.193662  | -0.382152 | -0.218719 |
| C  | 5.126201  | 0.663416  | -0.302036 |
| C  | 6.459441  | 0.449104  | -0.626096 |
| C  | 6.874767  | -0.862135 | -0.865303 |
| C  | 5.993933  | -1.942030 | -0.780966 |
| C  | 4.669753  | -1.681287 | -0.453832 |
| O  | 4.696598  | 1.954153  | -0.035751 |
| P  | 3.070829  | 2.111481  | 0.357303  |
| C  | 2.595581  | 3.452142  | -0.793234 |
| O  | 3.782620  | -2.740512 | -0.340717 |
| P  | 2.207693  | -2.327754 | 0.074644  |
| C  | 1.295876  | -3.249281 | -1.217400 |
| C  | -1.161801 | 0.588490  | -1.880848 |
| O  | -3.570422 | 0.943495  | -0.451577 |
| C  | -4.243385 | -0.294902 | -0.876314 |
| O  | -5.104592 | -0.683550 | 0.117463  |
| Si | -6.053090 | -2.117937 | 0.183315  |
| C  | -6.818952 | -2.059405 | 1.883145  |
| C  | -1.812069 | -0.819535 | 1.004021  |
| C  | 1.956650  | -3.323745 | 1.584319  |
| C  | 3.169190  | 2.936172  | 1.983218  |
| Si | -4.642987 | 2.385744  | -0.259013 |
| C  | -3.697218 | 3.859457  | -0.916128 |
| C  | -6.139950 | 2.088529  | -1.339689 |
| C  | -5.096574 | 2.502706  | 1.546244  |
| C  | -7.334668 | -2.053064 | -1.184609 |
| C  | -4.907734 | -3.588298 | -0.040009 |
| H  | 0.572686  | 0.286348  | 0.247401  |
| H  | 1.799041  | -0.037970 | 1.693841  |
| H  | 1.461811  | -2.774795 | -2.185222 |
| H  | 1.642772  | -4.283730 | -1.261161 |
| H  | 2.570447  | -2.914265 | 2.386838  |
| H  | 2.238466  | -4.363268 | 1.405727  |
| H  | 0.907811  | -3.274793 | 1.884727  |
| H  | 0.227184  | -3.233438 | -0.993186 |
| H  | 3.302103  | 4.281707  | -0.723176 |
| H  | 2.593142  | 3.068318  | -1.814014 |
| H  | 1.592691  | 3.805956  | -0.545454 |
| H  | 3.818868  | 3.811738  | 1.927445  |
| H  | 3.569810  | 2.233121  | 2.713760  |
| H  | 2.169726  | 3.241788  | 2.300401  |
| H  | 7.151615  | 1.279122  | -0.682121 |
| H  | 7.911952  | -1.047616 | -1.119337 |
| H  | 6.327032  | -2.956567 | -0.956831 |
| H  | -2.805382 | -0.886156 | 1.453246  |
| H  | -1.617705 | -1.739546 | 0.448266  |
| H  | -1.069355 | -0.756546 | 1.799279  |
| H  | -2.115992 | 2.613277  | 1.478434  |
| H  | -0.442121 | 2.065970  | 1.523170  |
| H  | -0.988483 | 3.089228  | 0.195068  |
| H  | -1.626044 | 1.392030  | -2.459075 |
| H  | -0.079640 | 0.662835  | -1.978986 |
| H  | -1.469435 | -0.363356 | -2.323077 |
| H  | -4.418534 | 4.668258  | -1.075417 |
| H  | -2.933249 | 4.239426  | -0.238989 |
| H  | -3.234910 | 3.651387  | -1.884746 |
| H  | -5.809457 | 3.321043  | 1.690465  |
| H  | -5.572620 | 1.577108  | 1.876548  |

|   |           |           |           |
|---|-----------|-----------|-----------|
| H | -4.241809 | 2.697850  | 2.197155  |
| H | -6.794791 | 2.960082  | -1.233940 |
| H | -5.890594 | 2.007570  | -2.401021 |
| H | -6.715390 | 1.211848  | -1.041119 |
| H | -7.950807 | -2.957507 | -1.164553 |
| H | -8.008622 | -1.199695 | -1.069339 |
| H | -6.883986 | -1.996945 | -2.180130 |
| H | -5.473878 | -4.520081 | 0.054619  |
| H | -4.433147 | -3.605971 | -1.025942 |
| H | -4.121474 | -3.606473 | 0.719738  |
| H | -7.450425 | -2.937167 | 2.049691  |
| H | -6.055844 | -2.047184 | 2.665642  |
| H | -7.447821 | -1.174061 | 2.008733  |
| H | -4.752921 | -0.069566 | -1.816728 |
| H | -3.449404 | -1.023141 | -1.057478 |

**TS11b-syn**

|    |           |           |           |
|----|-----------|-----------|-----------|
| Ir | -1.418500 | -0.009689 | 0.337537  |
| Si | 1.694730  | -0.869758 | 1.919718  |
| O  | 2.269456  | -0.977972 | -0.175855 |
| C  | 2.166482  | 0.301022  | -0.874661 |
| O  | 2.908201  | 1.268616  | -0.237404 |
| Si | 4.281024  | 2.159887  | -0.755272 |
| C  | 3.898471  | 3.946062  | -0.350330 |
| C  | -3.205371 | 0.511387  | -0.499658 |
| C  | -3.587639 | 1.853863  | -0.648082 |
| C  | -4.775780 | 2.231331  | -1.258656 |
| C  | -5.625777 | 1.229332  | -1.726981 |
| C  | -5.306883 | -0.121619 | -1.587887 |
| C  | -4.108172 | -0.453802 | -0.972064 |
| P  | -2.321101 | -2.115709 | -0.081266 |
| C  | -2.829229 | -3.194566 | 1.298061  |
| P  | -1.347754 | 2.307415  | 0.587848  |
| C  | -1.513951 | 3.073444  | 2.234479  |
| O  | -2.749574 | 2.839001  | -0.151940 |
| O  | -3.792115 | -1.792779 | -0.805611 |
| C  | 0.721862  | -2.311057 | 2.646315  |
| C  | 1.466871  | 0.791648  | 2.774255  |
| C  | 3.511537  | -1.277134 | 2.274776  |
| C  | -1.611006 | -3.262649 | -1.314493 |
| C  | -0.108426 | 3.335182  | -0.273361 |
| Si | 2.958106  | -2.351236 | -1.043724 |
| C  | 2.484115  | -3.913441 | -0.131555 |
| C  | 2.196004  | -2.367931 | -2.759085 |
| C  | 4.814548  | -2.145682 | -1.135661 |
| C  | 5.774382  | 1.569177  |           |

0.206811

|   |           |           |           |
|---|-----------|-----------|-----------|
| C | 4.501992  | 1.918624  | -2.605980 |
| H | -6.557952 | 1.506556  | -2.204559 |
| H | -5.029114 | 3.279005  | -1.354989 |
| H | -5.971615 | -0.899314 | -1.940542 |
| H | -2.326996 | -4.055530 | -1.540348 |
| H | -0.690953 | -3.704246 | -0.929189 |
| H | -1.388346 | -2.714919 | -2.231043 |
| H | -0.350163 | 4.393613  | -0.157387 |
| H | 0.884505  | 3.133370  | 0.131556  |
| H | -0.115279 | 3.086352  | -1.335855 |
| H | -3.374638 | -2.603299 | 2.034092  |
| H | -3.476614 | -3.990852 | 0.925538  |
| H | -1.950833 | -3.630997 | 1.776210  |
| H | -1.792996 | 4.122449  | 2.116964  |
| H | -0.572810 | 3.006209  | 2.781236  |
| H | -2.291995 | 2.555918  | 2.796213  |
| H | -1.808091 | -0.144045 | 1.820657  |
| H | 0.195021  | -0.464165 | 0.900977  |
| H | 0.431881  | 0.916290  | 3.091783  |

|   |           |           |           |
|---|-----------|-----------|-----------|
| H | 2.123829  | 0.841548  | 3.647945  |
| H | -0.273255 | -1.982195 | 2.948375  |
| H | 1.739245  | 1.608971  | 2.105005  |
| H | 0.609511  | -3.136494 | 1.941702  |
| H | 3.621345  | -1.289923 | 3.365732  |
| H | 4.184375  | -0.512255 | 1.883949  |
| H | 3.847213  | -2.249841 | 1.913042  |
| H | 1.255029  | -2.699377 | 3.519884  |
| H | 2.891932  | -4.758149 | -0.697121 |
| H | 2.890135  | -3.978820 | 0.878240  |
| H | 1.403348  | -4.057521 | -0.078101 |
| H | 2.446108  | -3.318709 | -3.241015 |
| H | 1.106080  | -2.297827 | -2.726029 |
| H | 2.568908  | -1.576628 | -3.413478 |
| H | 5.243745  | -2.987287 | -1.689171 |
| H | 5.106522  | -1.233603 | -1.661497 |
| H | 5.275717  | -2.129761 | -0.146269 |
| H | 6.650740  | 2.170379  | -0.055509 |
| H | 5.619070  | 1.675387  | 1.284003  |
| H | 6.020211  | 0.524532  | 0.001989  |
| H | 4.754691  | 4.582343  | -0.594482 |
| H | 3.040704  | 4.319448  | -0.916027 |
| H | 3.689231  | 4.079345  | 0.714844  |
| H | 5.336980  | 2.538970  | -2.946768 |
| H | 4.741423  | 0.889527  | -2.888204 |
| H | 3.621129  | 2.232327  | -3.173981 |
| H | 2.478627  | 0.143438  | -1.909854 |
| H | 1.105762  | 0.561631  | -0.838711 |

**IM11b**

|    |           |           |           |
|----|-----------|-----------|-----------|
| C  | 5.723066  | -1.628057 | 1.476168  |
| C  | 4.713231  | -1.282958 | 0.585569  |
| C  | 4.035220  | -0.057151 | 0.662389  |
| C  | 4.429784  | 0.838690  | 1.667229  |
| C  | 5.434448  | 0.534278  | 2.578446  |
| C  | 6.065904  | -0.706088 | 2.467256  |
| Ir | 2.516902  | 0.412412  | -0.656294 |
| P  | 3.187829  | -1.617382 | -1.493303 |
| C  | 2.145829  | -3.120602 | -1.584261 |
| O  | 4.365699  | -2.170963 | -0.416480 |
| O  | 3.798922  | 2.067050  | 1.744805  |
| P  | 2.653579  | 2.368429  | 0.540000  |
| C  | 3.366540  | 3.838972  | -0.278285 |
| C  | 1.313775  | 3.066174  | 1.574916  |
| C  | 4.099754  | -1.641620 | -3.077251 |
| C  | -0.892760 | -1.154490 | 1.027116  |
| Si | -2.032827 | -0.545849 | -0.307102 |
| O  | -3.745245 | -1.113911 | 0.104154  |
| Si | -4.338856 | -2.068865 | 1.552753  |
| C  | -4.238126 | -0.917570 | 3.012495  |
| C  | -2.145132 | 1.313498  | -0.334176 |
| C  | -1.694540 | -1.324354 | -1.966690 |
| C  | -4.807583 | -0.521020 | -0.762634 |
| O  | -5.480186 | 0.408583  | -0.031344 |
| Si | -6.655706 | 1.550944  | -0.578350 |
| C  | -8.109939 | 0.600838  | -1.282348 |
| C  | -7.090150 | 2.492444  | 0.971076  |
| C  | -5.856364 | 2.631637  | -1.885312 |
| C  | -6.086094 | -2.583934 | 1.145542  |
| C  | -3.247737 | -3.579728 | 1.670260  |
| H  | 6.230361  | -2.580410 | 1.392611  |
| H  | 6.853305  | -0.958483 | 3.168449  |
| H  | 5.719031  | 1.245224  | 3.343195  |
| H  | 1.704603  | 3.856491  | 2.219008  |
| H  | 0.534203  | 3.476061  | 0.929064  |
| H  | 0.887116  | 2.276996  | 2.194336  |



|   |           |          |           |          |           |           |           |
|---|-----------|----------|-----------|----------|-----------|-----------|-----------|
| H | 1.177876  | 4.175331 | -0.556307 | Si       | 2.641658  | -0.337354 | -0.030239 |
| H | 2.586488  | 3.863172 | 5.481805  | Ir       | -1.299701 | -0.008744 | -0.281021 |
| H | 3.311598  | 2.986901 | 4.136340  | P        | -1.585922 | 2.281575  | -0.270355 |
| H | 3.017317  | 4.729728 | 4.012784  | C        | -0.676182 | 3.405147  | 0.851520  |
| H | 0.146220  | 1.714235 | 5.324317  | C        | -3.262826 | 0.125457  | 0.317448  |
| H | -0.757184 | 1.582507 | 3.815595  | C        | -4.041660 | -1.022061 | 0.536626  |
| H | 0.896922  | 0.968890 | 3.913207  | C        | -5.354422 | -0.956710 | 0.984586  |
| H | -0.371388 | 4.947995 | 5.233122  | C        | -5.909664 | 0.304212  | 1.210120  |
| H | 0.093476  | 5.819076 | 3.779565  | C        | -5.187567 | 1.478936  | 0.991812  |
| H | -1.278947 | 4.698325 | 3.745713  | C        | -3.878037 | 1.366809  | 0.543680  |
| H | 0.599523  | 5.173626 | 1.099069  | O        | -3.478345 | -2.261630 | 0.282199  |
| H | 2.324761  | 4.643008 | 1.055816  | P        | -1.891067 | -2.237802 | -0.270322 |
|   |           |          |           | C        | -1.158435 | -3.475272 | 0.862555  |
|   |           |          |           | O        | -3.150906 | 2.519129  | 0.295185  |
|   |           |          |           | C        | 2.077216  | -0.378590 | 1.753957  |
|   |           |          |           | C        | 2.396220  | -1.796662 | -1.183469 |
|   |           |          |           | C        | 2.718709  | 1.311551  | -0.907364 |
|   |           |          |           | O        | 4.527394  | -0.642975 | 0.366781  |
|   |           |          |           | C        | 4.795341  | -2.000490 | 0.859459  |
|   |           |          |           | C        | -2.040698 | -3.132196 | -1.855301 |
|   |           |          |           | C        | -1.629516 | 3.185831  | -1.856243 |
|   |           |          |           | Si       | 5.974184  | 0.424055  | 0.193401  |
|   |           |          |           | C        | 6.443825  | 0.364069  | -1.612165 |
|   |           |          |           | C        | 5.515193  | 2.117809  |           |
|   |           |          |           | 0.831105 |           |           |           |
|   |           |          |           | C        | 7.304810  | -0.316136 | 1.278824  |
|   |           |          |           | H        | 0.354717  | -0.122743 | -0.416267 |
|   |           |          |           | H        | -0.938975 | -0.034212 | -1.787802 |
|   |           |          |           | H        | -1.120774 | -3.066456 | 1.872853  |
|   |           |          |           | H        | -1.761682 | -4.385433 | 0.867708  |
|   |           |          |           | H        | -2.589574 | -2.511252 | -2.563465 |
|   |           |          |           | H        | -2.570437 | -4.075948 | -1.711941 |
|   |           |          |           | H        | -1.045158 | -3.328416 | -2.259329 |
|   |           |          |           | H        | -0.144103 | -3.715312 | 0.536826  |
|   |           |          |           | H        | -1.156454 | 4.385462  | 0.876501  |
|   |           |          |           | H        | -0.666251 | 2.985458  | 1.857988  |
|   |           |          |           | H        | 0.352603  | 3.513849  | 0.501504  |
|   |           |          |           | H        | -2.025741 | 4.192540  | -1.709868 |
|   |           |          |           | H        | -2.265285 | 2.643234  | -2.556064 |
|   |           |          |           | H        | -0.621515 | 3.246210  | -2.272516 |
|   |           |          |           | H        | -5.630462 | 2.452424  | 1.156914  |
|   |           |          |           | H        | -6.933263 | 0.373178  | 1.559710  |
|   |           |          |           | H        | -5.926218 | -1.861455 | 1.144567  |
|   |           |          |           | H        | 3.331874  | -2.080166 | -1.673204 |
|   |           |          |           | H        | 1.994613  | -2.673545 | -0.671520 |
|   |           |          |           | H        | 1.678218  | -1.515011 | -1.953663 |
|   |           |          |           | H        | 3.585725  | 1.400468  | -1.564513 |
|   |           |          |           | H        | 1.824961  | 1.390375  | -1.526669 |
|   |           |          |           | H        | 2.718087  | 2.150390  | -0.210015 |
|   |           |          |           | H        | 2.672224  | 0.314122  | 2.355921  |
|   |           |          |           | H        | 1.028662  | -0.088967 | 1.817978  |
|   |           |          |           | H        | 2.175004  | -1.374810 | 2.192788  |
|   |           |          |           | H        | 6.445936  | 2.660228  | 1.028539  |
|   |           |          |           | H        | 4.935036  | 2.716138  | 0.129659  |
|   |           |          |           | H        | 4.972409  | 2.063866  | 1.778625  |
|   |           |          |           | H        | 7.357928  | 0.946671  | -1.766320 |
|   |           |          |           | H        | 6.653793  | -0.658195 | -1.938773 |
|   |           |          |           | H        | 5.678646  | 0.779008  | -2.271328 |
|   |           |          |           | H        | 8.181782  | 0.336012  | 1.204415  |
|   |           |          |           | H        | 7.022097  | -0.345788 | 2.334326  |
|   |           |          |           | H        | 7.626575  | -1.314466 | 0.976319  |
|   |           |          |           | H        | 5.174047  | -1.948543 | 1.877714  |
|   |           |          |           | H        | 3.866555  | -2.562688 | 0.845850  |
|   |           |          |           | H        | 5.515420  | -2.489770 | 0.204837  |

TS14b

TS14b-syn

|    |           |           |           |          |           |           |           |
|----|-----------|-----------|-----------|----------|-----------|-----------|-----------|
| Si | 2.511084  | 1.026346  | 1.315642  | C        | 3.224008  | -1.439440 | 1.332829  |
| Ir | -0.776084 | 0.121791  | 0.267764  | C        | 2.854065  | -0.163655 | 0.880922  |
| P  | -0.776046 | -2.148286 | 0.781682  | C        | 3.389693  | 0.942450  | 1.558197  |
| C  | -0.779770 | -2.675765 | 2.527086  | C        | 4.232676  | 0.802958  | 2.654485  |
| C  | -2.654719 | -0.391834 | -0.333605 | C        | 4.554338  | -0.489524 | 3.073514  |
| C  | -3.108238 | -1.719353 | -0.277637 | Ir       | 1.576289  | 0.076824  | -0.722309 |
| C  | -4.361142 | -2.102314 | -0.735450 | P        | 1.800123  | -2.209774 | -0.702245 |
| C  | -5.202668 | -1.119576 | -1.257151 | C        | 0.442808  | -3.407345 | -0.420790 |
| C  | -4.812206 | 0.218340  | -1.318883 | O        | 2.739417  | -2.546867 | 0.660219  |
| C  | -3.550837 | 0.557300  | -0.850071 | O        | 3.071181  | 2.211837  |           |
| O  | -2.271727 | -2.682310 | 0.263973  | 1.110458 |           |           |           |
| O  | -3.159498 | 1.886443  | -0.884874 | P        | 2.110757  | 2.267684  | -0.277085 |
| P  | -1.650850 | 2.223144  | -0.251686 | C        | 3.209984  | 3.136590  | -1.449654 |
| C  | -2.071526 | 3.367687  | 1.105456  | C        | 0.925529  | 3.564650  | 0.238012  |
| C  | 1.695849  | 2.682986  | 1.714529  | C        | 2.783357  | -2.991887 | -2.029084 |
| C  | 4.346693  | 1.512745  | 1.314586  | C        | -2.130301 | 0.004374  | 0.898858  |
| O  | 2.884740  | 0.383315  | -0.705993 | Si       | -3.020736 | 0.266453  | -0.708351 |
| C  | 2.203810  | 1.173884  | -1.712688 | O        | -4.842084 | 0.272633  | -0.335847 |
| C  | 2.337882  | -0.322007 | 2.615356  | Si       | -5.707119 | -0.197269 | 1.211838  |
| C  | -0.998141 | 3.310505  | -1.567622 | C        | -5.018917 | 0.876665  | 2.569926  |
| C  | 0.299843  | -3.365324 | -0.054477 | C        | -2.704006 | 1.953421  | -1.432169 |
| Si | 4.038643  | -0.802315 | -1.327023 | C        | -2.819728 | -1.149030 | -1.902775 |
| C  | 3.175370  | -1.692615 | -2.732519 | C        | -5.688776 | 0.477912  | -1.528905 |
| C  | 5.550692  | 0.117124  | -1.930876 | C        | -7.509627 | 0.186446  | 0.916795  |
| C  | 4.434208  | -1.995532 | 0.056055  | C        | -5.394323 | -2.024912 | 1.403156  |
| H  | -6.184508 | -1.401180 | -1.618384 | H        | 4.333544  | -2.620683 | 2.750358  |
| H  | -5.469671 | 0.982082  | -1.713165 | H        | 5.212985  | -0.615950 | 3.925296  |
| H  | -4.668345 | -3.138317 | -0.677948 | H        | 4.631874  | 1.674163  | 3.157358  |
| H  | -0.051762 | -4.377242 | 0.157151  | H        | 1.460640  | 4.440225  | 0.611385  |
| H  | 1.326792  | -3.258360 | 0.298230  | H        | 0.310430  | 3.853348  | -0.617130 |
| H  | 0.271060  | -3.198377 | -1.131802 | H        | 0.282626  | 3.175007  | 1.027660  |
| H  | -1.725168 | 4.093744  | -1.791799 | H        | 4.036792  | 2.476639  | -1.712040 |
| H  | -0.063634 | 3.772085  | -1.242914 | H        | 2.652376  | 3.373046  | -2.358542 |
| H  | -0.819075 | 2.727449  | -2.471630 | H        | 3.599454  | 4.054811  | -1.005696 |
| H  | -1.502137 | -2.076452 | 3.081859  | H        | 3.699438  | -2.419240 | -2.173474 |
| H  | -1.058204 | -3.729207 | 2.594886  | H        | 2.211862  | -2.972996 | -2.959688 |
| H  | 0.209951  | -2.530290 | 2.962810  | H        | 3.032561  | -4.022629 | -1.769329 |
| H  | -2.724231 | 4.158495  | 0.730532  | H        | 0.849532  | -4.402191 | -0.227870 |
| H  | -1.165614 | 3.810575  | 1.522119  | H        | -0.198383 | -3.442733 | -1.304245 |
| H  | -2.590256 | 2.816106  | 1.890029  | H        | -0.146785 | -3.090110 | 0.439783  |
| H  | -0.992454 | 0.430527  | 1.760383  | H        | 0.170063  | 0.256288  | -1.510542 |
| H  | 0.920391  | 0.513302  | 0.591937  | H        | 1.609498  | 0.223094  | -2.291065 |
| H  | 0.709056  | 2.529674  | 2.150811  | H        | -1.757074 | -1.204700 | -2.159709 |
| H  | 2.325639  | 3.235320  | 2.418491  | H        | -3.374355 | -1.022279 | -2.835084 |
| H  | 3.087569  | -0.176569 | 3.398930  | H        | -3.107209 | -2.104204 | -1.455716 |
| H  | 1.585967  | 3.311699  | 0.826391  | H        | -3.181224 | 2.125325  | -2.398935 |
| H  | 1.342832  | -0.290170 | 3.061527  | H        | -1.622863 | 2.029733  | -1.587645 |
| H  | 4.559316  | 1.943269  | 2.300018  | H        | -3.003063 | 2.752626  | -0.749083 |
| H  | 4.575188  | 2.281658  | 0.571852  | H        | -1.066858 | -0.057391 | 0.620282  |
| H  | 5.044753  | 0.687034  | 1.172405  | H        | -2.235596 | 0.842991  | 1.588154  |
| H  | 2.493400  | -1.318107 | 2.196851  | H        | -2.386903 | -0.921897 | 1.415634  |
| H  | 5.142477  | -2.733893 | -0.334699 | H        | -5.712723 | 0.827274  | 3.416239  |
| H  | 4.903087  | -1.530941 | 0.924147  | H        | -4.042182 | 0.558218  | 2.932680  |
| H  | 3.554119  | -2.546735 | 0.393539  | H        | -4.957252 | 1.925939  | 2.269084  |
| H  | 3.817351  | -2.506709 | -3.084218 | H        | -5.915970 | -2.385449 | 2.295879  |
| H  | 2.229061  | -2.139218 | -2.417212 | H        | -5.779251 | -2.593334 | 0.552204  |
| H  | 2.978045  | -1.050009 | -3.593648 | H        | -4.337002 | -2.266299 | 1.527481  |
| H  | 6.255819  | -0.597599 | -2.367749 | H        | -8.045289 | -0.091687 | 1.831375  |
| H  | 5.316230  | 0.848214  | -2.709373 | H        | -7.699502 | 1.250165  | 0.753083  |
| H  | 6.067834  | 0.638893  | -1.123235 | H        | -7.962580 | -0.381273 | 0.101809  |
| H  | 2.850695  | 1.313254  | -2.580039 | H        | -6.201101 | -0.451868 | -1.768815 |
| H  | 1.280650  | 0.678295  | -2.014907 | H        | -6.396629 | 1.275475  | -1.322104 |
| H  | 1.974757  | 2.153420  | -1.297999 | H        | -5.047873 | 0.767759  | -2.356063 |

**IM14b**

C 4.063955 -1.624466 2.424574

**TS15b**

Ir 1.348139 0.007781 -0.031360  
Si -4.682388 -0.241389 -1.554817



|    |           |           |           |          |           |           |           |
|----|-----------|-----------|-----------|----------|-----------|-----------|-----------|
| O  | -4.011463 | -0.088650 | 0.070037  | C        | -0.076894 | -0.656817 | -3.194773 |
| C  | -2.211663 | -0.025470 | 0.060675  | C        | 2.119014  | 0.506350  |           |
| C  | 3.395045  | -0.011765 | 0.085448  | 0.921669 |           |           |           |
| C  | 4.140575  | 1.176155  | 0.069047  | C        | 1.851181  | 1.729970  |           |
| C  | 5.523483  | 1.189063  | 0.192167  | 1.545052 |           |           |           |
| C  | 6.184227  | -0.033444 | 0.324576  | C        | 2.385863  | 2.055178  | 2.784252  |
| C  | 5.492721  | -1.246060 | 0.330339  | C        | 3.223377  | 1.133072  | 3.410718  |
| C  | 4.110404  | -1.212278 | 0.204813  | C        | 3.529696  | -0.090607 | 2.816837  |
| P  | 1.740900  | -2.269336 | 0.045495  | C        | 2.977231  | -0.382515 | 1.577064  |
| C  | 1.407767  | -3.315983 | -1.411721 | P        | 2.654745  | -1.852619 | -0.545765 |
| P  | 1.798606  | 2.268030  | -0.218014 | C        | 4.135952  | -2.007331 | -1.594462 |
| C  | 1.492531  | 3.139410  | -1.791346 | P        | 0.510431  | 2.244656  | -0.623854 |
| O  | 3.465461  | 2.378960  | -0.088839 | C        | 1.271339  | 3.525226  | -1.672025 |
| O  | 3.404821  | -2.407808 | 0.184445  | O        | 1.020201  | 2.644933  | 0.907518  |
| C  | -4.014422 | -1.844637 | -2.253791 | O        | 3.281243  | -1.597554 | 0.973309  |
| C  | -4.100101 | 1.264059  | -2.502167 | C        | -5.674316 | -1.491251 | -1.213338 |
| C  | -6.548203 | -0.299182 | -1.457983 | C        | -4.888234 | 1.477418  | -1.492398 |
| C  | 1.200285  | -3.290335 | 1.463129  | C        | -6.213190 | 0.473693  | 1.114334  |
| C  | 1.281961  | 3.460781  | 1.067985  | C        | 2.013274  | -3.552312 | -0.414662 |
| Si | -4.788852 | 0.244814  | 1.623294  | C        | -1.254956 | 2.680815  | -0.575175 |
| C  | -6.079907 | -1.071020 | 1.935107  | Si       | -2.596633 | -1.097069 | 1.405716  |
| C  | -3.456285 | 0.139090  | 2.935379  | C        | -3.306239 | -2.788897 | 1.798433  |
| C  | -5.494321 | 1.974870  | 1.523306  | C        | -0.899726 | -1.344429 | 0.564890  |
| H  | 7.263477  | -0.041560 | 0.421486  | C        | -2.371963 | -0.073808 | 2.959632  |
| H  | 6.066056  | 2.125363  | 0.178458  | H        | 3.649120  | 1.374610  | 4.376806  |
| H  | 6.011498  | -2.191249 | 0.423713  | H        | 2.151943  | 3.009421  | 3.237922  |
| H  | 1.695493  | -4.263322 | 1.441994  | H        | 4.185573  | -0.805778 | 3.295947  |
| H  | 0.118076  | -3.431940 | 1.419922  | H        | 2.794289  | -4.212916 | -0.032393 |
| H  | 1.452146  | -2.781433 | 2.394429  | H        | 1.701944  | -3.899445 | -1.402861 |
| H  | 1.813911  | 4.406502  | 0.945699  | H        | 1.156404  | -3.580920 | 0.257057  |
| H  | 0.206469  | 3.635935  | 0.993050  | H        | -1.373080 | 3.677643  | -0.144378 |
| H  | 1.503779  | 3.050372  | 2.053899  | H        | -1.649988 | 2.682281  | -1.593859 |
| H  | 1.801142  | -2.825480 | -2.302336 | H        | -1.820329 | 1.956462  | 0.011052  |
| H  | 1.884992  | -4.290904 | -1.294580 | H        | 4.672745  | -1.058531 | -1.606679 |
| H  | 0.330067  | -3.449509 | -1.528126 | H        | 4.792566  | -2.790625 | -1.210556 |
| H  | 1.985612  | 4.113463  | -1.789742 | H        | 3.836893  | -2.255286 | -2.615920 |
| H  | 0.417901  | 3.274246  | -1.932007 | H        | 0.966587  | 4.518716  | -1.337054 |
| H  | 1.882924  | 2.538151  | -2.612681 | H        | 0.959503  | 3.381620  | -2.709301 |
| H  | 1.001898  | -0.074524 | -1.531067 | H        | 2.356940  | 3.441562  | -1.616537 |
| H  | -0.348449 | 0.041124  | 0.069392  | H        | 2.520919  | 0.675765  | -1.569559 |
| H  | -3.011922 | 1.326370  | -2.583000 | H        | 0.905176  | -0.264295 | -2.820822 |
| H  | -4.496630 | 1.231151  | -3.521845 | H        | -4.193061 | 1.242021  | -2.303915 |
| H  | -4.485464 | -2.037516 | -3.223053 | H        | -5.852286 | 1.721652  | -1.948692 |
| H  | -4.459904 | 2.189143  | -2.043295 | H        | -6.656299 | -1.307493 | -1.660326 |
| H  | -2.934759 | -1.837241 | -2.422025 | H        | -4.530245 | 2.376973  | -0.983646 |
| H  | -6.926851 | -0.292248 | -2.486015 | H        | -4.994162 | -1.774610 | -2.022141 |
| H  | -6.992423 | 0.560734  | -0.952780 | H        | -7.213742 | 0.713804  | 0.741774  |
| H  | -6.917463 | -1.211908 | -0.986946 | H        | -5.852205 | 1.343841  | 1.670255  |
| H  | -4.251931 | -2.691206 | -1.603698 | H        | -6.320878 | -0.354802 | 1.820842  |
| H  | -6.389198 | -1.011096 | 2.983911  | H        | -5.776934 | -2.350775 | -0.544713 |
| H  | -6.977967 | -0.956084 | 1.327357  | H        | -2.649317 | -3.343285 | 2.475883  |
| H  | -5.679973 | -2.076073 | 1.774544  | H        | -4.278929 | -2.702767 | 2.291809  |
| H  | -3.925712 | 0.362480  | 3.899283  | H        | -3.442938 | -3.392013 | 0.896554  |
| H  | -3.025803 | -0.862364 | 3.020277  | H        | -0.158337 | -1.686256 | 1.288226  |
| H  | -2.642611 | 0.855889  | 2.805054  | H        | -0.972945 | -2.061794 | -0.254148 |
| H  | -5.949055 | 2.241134  | 2.482827  | H        | -0.608057 | -0.347205 | 0.171432  |
| H  | -4.717952 | 2.716514  | 1.315192  | H        | -1.722597 | -0.581320 | 3.679462  |
| H  | -6.269849 | 2.074925  | 0.760541  | H        | -1.932009 | 0.905353  | 2.749651  |
| H  | -2.084820 | 1.016130  | 0.299072  | H        | -3.334173 | 0.097679  | 3.450828  |
| H  | -2.028482 | -0.754658 | 0.828562  | H        | -0.421329 | 0.074700  | -3.924669 |
| H  | -2.035298 | -0.326300 | -0.956588 | H        | -0.836398 | -0.794086 | -2.428955 |
|    |           |           |           | H        | 0.138075  | -1.607408 | -3.680042 |

**IM15**

|    |           |           |           |
|----|-----------|-----------|-----------|
| Ir | 1.304264  | 0.047358  | -0.849657 |
| Si | -5.063374 | 0.034072  | -0.303020 |
| O  | -3.525539 | -0.276157 | 0.307866  |

**(POCOP)IrH<sub>2</sub>**

|   |           |          |          |
|---|-----------|----------|----------|
| C | -1.273848 | 1.812202 | 0.128891 |
| C | -1.332481 | 3.206133 | 0.069575 |

|                                              |           |          |           |             |           |           |           |           |
|----------------------------------------------|-----------|----------|-----------|-------------|-----------|-----------|-----------|-----------|
| C                                            | -0.141620 | 3.915769 | 0.195885  | H           | 2.079105  | 1.592529  | 1.027792  |           |
| C                                            | 1.089201  | 3.272631 | 0.377578  | H           | -0.032733 | 0.285043  | 0.969766  |           |
| C                                            | 1.096122  | 1.873092 | 0.430488  | H           | -2.208046 | 1.385380  | 0.490367  |           |
| C                                            | -0.071506 | 1.125115 | 0.308570  | H           | -0.130217 | 7.405300  | -1.001450 |           |
| O                                            | -0.168953 | 5.298113 | 0.141101  |             |           |           |           |           |
| P                                            | 1.340842  | 6.057390 | 0.306117  |             |           |           |           |           |
| C                                            | 0.972822  | 7.225235 | 1.665507  |             |           |           |           |           |
| Ir                                           | 2.842752  | 4.356332 | 0.561724  | <b>TS17</b> |           |           |           |           |
| P                                            | 3.659064  | 2.231576 | 0.745460  | C           | -1.212448 | 1.745961  | -0.021097 |           |
| C                                            | 4.375112  | 1.610396 |           | C           | -1.258668 | 3.134104  | 0.047086  |           |
| 2.310276                                     |           |          |           | C           | -0.118791 | 3.914628  | 0.238467  |           |
| O                                            | 2.302484  | 1.219440 | 0.609512  | C           | 1.099303  | 3.243418  | 0.342920  |           |
| C                                            | 1.337538  | 7.119354 | -1.183661 | C           | 1.197947  | 1.857698  | 0.281314  |           |
| C                                            | 4.740042  | 1.504080 | -0.538849 | C           | 0.028109  | 1.118895  |           |           |
| H                                            | 1.443078  | 6.489676 | -2.067239 | 0.100603    | O         | -2.487526 | 3.779344  | -0.089631 |
| H                                            | 0.411977  | 7.695164 | -1.250708 | O           | -2.450421 | 5.450042  | 0.015531  |           |
| H                                            | 0.845801  | 6.662564 | 2.590504  | C           | -3.315614 | 5.937358  | -1.515094 |           |
| H                                            | 0.066108  | 7.796423 | 1.454957  | Ir          | -0.228363 | 5.960478  | 0.356148  |           |
| H                                            | 1.819037  | 7.905214 | 1.785938  | P           | 2.046078  | 5.658647  | 0.578310  |           |
| H                                            | 2.192572  | 7.797308 | -1.136083 | C           | 3.212188  | 6.239032  | -0.699320 |           |
| H                                            | 4.819185  | 0.421845 | -0.415486 | O           | 2.259858  | 3.999467  | 0.505987  |           |
| H                                            | 4.325653  | 1.732373 | -1.520943 | C           | -3.666431 | 5.764134  | 1.341465  |           |
| H                                            | 5.730617  | 1.958357 | -0.465623 | C           | 2.866291  | 6.068161  | 2.157858  |           |
| H                                            | 4.473435  | 0.522901 | 2.290202  | O           | -0.608632 | 8.960551  | 2.301288  |           |
| H                                            | 3.728438  | 1.905388 | 3.136802  | C           | -0.532460 | 7.795861  | 2.109696  |           |
| H                                            | 5.356013  | 2.068101 | 2.456202  | O           | -0.544546 | 6.680056  | 2.607628  |           |
| H                                            | 3.913694  | 5.109656 | 1.471113  | H           | -2.695569 | 5.672234  | -2.371609 |           |
| H                                            | -0.041335 | 0.043822 | 0.352620  | H           | -4.281076 | 5.432825  | -1.591649 |           |
| H                                            | -2.192824 | 1.244247 | 0.032163  | H           | -3.239004 | 5.453918  | 2.295428  |           |
| H                                            | -2.272125 | 3.725347 | -0.070182 | H           | -4.590793 | 5.213907  | 1.154098  |           |
| H                                            | 4.115098  | 5.051168 | -0.101550 | H           | -3.879618 | 6.834594  | 1.389144  |           |
|                                              |           |          |           | H           | -3.464081 | 7.019440  | -1.512526 |           |
|                                              |           |          |           | H           | 4.208803  | 5.825768  | -0.530495 |           |
|                                              |           |          |           | H           | 2.848092  | 5.927200  | -1.678382 |           |
|                                              |           |          |           | H           | 3.256125  | 7.330077  | -0.673884 |           |
| <b>(POCOP)IrH<sub>2</sub>+CO<sub>2</sub></b> |           |          |           | H           | 3.854368  | 5.606249  | 2.209310  |           |
| C                                            | -1.290618 | 1.959439 | 0.517948  | H           | 2.248195  | 5.710364  | 2.981821  |           |
| C                                            | -1.305740 | 3.331923 | 0.284796  | H           | 2.963326  | 7.153011  | 2.243206  |           |
| C                                            | -0.135173 | 4.102050 | 0.315814  | H           | -0.336137 | 7.685202  | 0.570470  |           |
| C                                            | 1.074601  | 3.446916 | 0.583204  | H           | 2.163429  | 1.375918  | 0.371135  |           |
| C                                            | 1.132921  | 2.076531 | 0.821754  | H           | 0.084386  | 0.037611  | 0.051565  |           |
| C                                            | -0.061259 | 1.353560 | 0.785556  | H           | -2.122257 | 1.177249  | -0.166531 |           |
| O                                            | -2.508149 | 3.958384 | 0.015383  | H           | -0.034297 | 5.945574  | -1.184788 |           |
| P                                            | -2.402795 | 5.625231 | -0.293967 |             |           |           |           |           |
| C                                            | -3.149494 | 5.700602 | -1.963570 |             |           |           |           |           |
| Ir                                           | -0.190643 | 6.139783 | -0.027171 | <b>IM17</b> |           |           |           |           |
| P                                            | 2.057706  | 5.840607 | 0.264823  | C           | -1.210442 | 1.745474  | -0.028741 |           |
| C                                            | 3.180832  | 6.006054 | -1.171169 | C           | -1.257639 | 3.133565  | 0.030841  |           |
| O                                            | 2.241291  | 4.187877 | 0.610785  | C           | -0.115854 | 3.914817  | 0.215338  |           |
| C                                            | -3.729833 | 6.247036 | 0.796945  | C           | 1.102582  | 3.243014  | 0.325656  |           |
| C                                            | 3.011202  | 6.572647 |           | C           | 1.198154  | 1.857170  | 0.272094  |           |
| 1.640567                                     |           |          |           | C           | 0.028876  | 1.117425  |           |           |
| O                                            | 0.492668  | 5.806163 | 3.985871  | 0.095210    | O         | -2.487058 | 3.775254  | -0.106243 |
| C                                            | -0.654775 | 5.747133 | 3.823724  | O           | -2.456235 | 5.442705  | 0.009827  |           |
| O                                            | -1.806973 | 5.689426 | 3.699260  | C           | -3.351951 | 5.938400  | -1.499414 |           |
| H                                            | -2.469933 | 5.231309 | -2.675074 | Ir          | -0.223532 | 5.940080  | 0.325677  |           |
| H                                            | -4.114445 | 5.189510 | -1.983719 | P           | 2.054074  | 5.651850  | 0.573319  |           |
| H                                            | -3.414247 | 6.146146 | 1.834499  | C           | 3.243889  | 6.244403  | -0.675306 |           |
| H                                            | -4.655483 | 5.690513 | 0.635244  | O           | 2.264289  | 3.995578  | 0.487188  |           |
| H                                            | -3.892898 | 7.305201 | 0.579855  | C           | -3.630727 | 5.758987  | 1.369092  |           |
| H                                            | -3.279083 | 6.747612 | -2.246060 | C           | 2.825036  | 6.058190  | 2.175692  |           |
| H                                            | 4.165196  | 5.589079 | -0.947772 | O           | -0.605812 | 8.978304  | 2.255040  |           |
| H                                            | 2.744317  | 5.482883 | -2.022058 | C           | -0.515458 | 7.821486  | 1.963035  |           |
| H                                            | 3.275878  | 7.063902 | -1.425641 | O           | -0.531783 | 6.702755  | 2.511611  |           |
| H                                            | 3.996432  | 6.107866 | 1.718036  | H           | -2.748892 | 5.680374  | -2.370070 |           |
| H                                            | 2.461323  | 6.430697 | 2.569958  | H           | -4.318082 | 5.432828  | -1.559266 |           |
| H                                            | 3.122091  | 7.643860 | 1.457176  |             |           |           |           |           |
| H                                            | -0.333263 | 7.620783 | 0.544001  |             |           |           |           |           |

|             |           |          |           |             |           |           |           |
|-------------|-----------|----------|-----------|-------------|-----------|-----------|-----------|
| H           | -3.171366 | 5.451285 | 2.308750  | C           | 3.157316  | 6.307881  | -0.510933 |
| H           | -4.562750 | 5.212728 | 1.210519  | O           | 2.217942  | 3.963724  | 0.477410  |
| H           | -3.836744 | 6.830594 | 1.423945  | C           | -3.709264 | 5.552536  | 1.384545  |
| H           | -3.503779 | 7.020061 | -1.486432 | C           | 2.721123  | 5.896168  |           |
| H           | 4.237072  | 5.829680 | -0.490406 | 2.307034    |           |           |           |
| H           | 2.899156  | 5.942521 | -1.664410 | O           | -0.382545 | 9.454979  | 2.478107  |
| H           | 3.288655  | 7.335176 | -0.637647 | C           | -0.066340 | 8.598582  | 1.690750  |
| H           | 3.813214  | 5.600913 | 2.256998  | O           | -0.845229 | 7.628608  | 1.260783  |
| H           | 2.179020  | 5.699191 | 2.977214  | H           | -2.830474 | 5.678210  | -2.355855 |
| H           | 2.912793  | 7.143405 | 2.267338  | H           | -4.392918 | 5.329788  | -1.569322 |
| H           | -0.347299 | 7.731962 | 0.648859  | H           | -3.319936 | 5.059860  | 2.276311  |
| H           | 2.163946  | 1.377068 | 0.366640  | H           | -4.699438 | 5.157177  | 1.149281  |
| H           | 0.084321  | 0.035976 | 0.052828  | H           | -3.765169 | 6.625187  | 1.584339  |
| H           | -2.121999 | 1.178311 | -0.168669 | H           | -3.625701 | 6.931335  | -1.382776 |
| H           | -0.027908 | 5.887446 | -1.220635 | H           | 4.148563  | 5.877752  | -0.352684 |
|             |           |          |           | H           | 2.824912  | 6.092533  | -1.526641 |
|             |           |          |           | H           | 3.202745  | 7.391191  | -0.379516 |
|             |           |          |           | H           | 3.733274  | 5.486840  | 2.335614  |
|             |           |          |           | H           | 2.114073  | 5.412217  | 3.073416  |
|             |           |          |           | H           | 2.750540  | 6.968268  | 2.513252  |
|             |           |          |           | H           | 0.955801  | 8.578587  | 1.243050  |
|             |           |          |           | H           | 2.188867  | 1.341716  | 0.276698  |
|             |           |          |           | H           | 0.146671  | -0.038538 | -0.103714 |
|             |           |          |           | H           | -2.084720 | 1.053906  | -0.317678 |
|             |           |          |           | H           | -0.046681 | 5.608271  | -1.133824 |
| <b>TS18</b> |           |          |           | <b>IM19</b> |           |           |           |
| C           | -1.217372 | 1.743254 | 0.040768  | C           | 0.291587  | 1.283588  | -0.398011 |
| C           | -1.270506 | 3.131510 | 0.004949  | C           | -0.907653 | 1.896041  | -0.033208 |
| C           | -0.120791 | 3.915067 | 0.132825  | C           | -1.082537 | 3.226088  | -0.419123 |
| C           | 1.102821  | 3.258379 | 0.284508  | C           | -0.130126 | 3.920355  | -1.156819 |
| C           | 1.189916  | 1.872081 | 0.324797  | C           | 1.046277  | 3.262038  | -1.513097 |
| C           | 0.020725  | 1.122804 | 0.201077  | C           | 1.271376  | 1.938894  | -1.135398 |
| O           | -2.498264 | 3.758425 | -0.168087 | Ir          | -2.309330 | 0.919498  | 1.049178  |
| P           | -2.477637 | 5.428777 | -0.125903 | O           | -3.226069 | 0.095774  | -0.807164 |
| C           | -3.434829 | 5.843709 | -1.621560 | C           | -4.446922 | -0.296191 | -0.846819 |
| Ir          | -0.224890 | 5.903396 | 0.113165  | O           | -5.283958 | -0.280696 | 0.056695  |
| P           | 2.051773  | 5.671103 | 0.453298  | O           | -2.246609 | 3.886053  | -0.034094 |
| C           | 3.306628  | 6.245426 | -0.737902 | P           | -3.371757 | 2.951825  | 0.774907  |
| O           | 2.263686  | 4.014811 | 0.392294  | C           | -3.779679 | 4.023968  | 2.194509  |
| C           | -3.574621 | 5.819875 | 1.271725  | O           | 0.521562  | -0.027595 | 0.009748  |
| C           | 2.722971  | 6.095547 | 2.092657  | P           | -0.713607 | -0.745012 | 0.877292  |
| O           | -0.640333 | 8.551519 | 3.282989  | C           | 0.201603  | -1.400507 | 2.315652  |
| C           | -0.412737 | 7.874818 | 2.304758  | C           | -4.826448 | 3.076354  | -0.317178 |
| O           | -0.591395 | 6.598050 | 2.166747  | C           | -1.076426 | -2.213357 | -0.141567 |
| H           | -2.867061 | 5.542099 | -2.501905 | Si          | -4.453003 | -0.659854 | 3.031517  |
| H           | -4.400446 | 5.333449 | -1.613888 | C           | -4.583194 | -2.411618 | 2.378712  |
| H           | -3.029101 | 5.630720 | 2.196623  | C           | -3.566165 | -0.613374 | 4.693784  |
| H           | -4.489450 | 5.225669 | 1.226525  | C           | -6.109129 | 0.212143  | 3.121555  |
| H           | -3.823581 | 6.883658 | 1.243017  | H           | -1.584609 | -1.872601 | -1.043521 |
| H           | -3.596004 | 6.923688 | -1.658954 | H           | -0.157222 | -2.744739 | -0.396403 |
| H           | 4.284164  | 5.819590 | -0.501682 | H           | 0.528777  | -0.566707 | 2.937044  |
| H           | 3.007640  | 5.944483 | -1.742013 | H           | 1.069347  | -1.977196 | 1.988230  |
| H           | 3.367310  | 7.335668 | -0.699140 | H           | -0.457968 | -2.041580 | 2.905420  |
| H           | 3.704723  | 5.641263 | 2.240412  | H           | -1.748738 | -2.879440 | 0.404062  |
| H           | 2.022168  | 5.745033 | 2.850900  | H           | -5.144454 | 4.115166  | -0.426935 |
| H           | 2.802348  | 7.181580 | 2.182924  | H           | -4.554579 | 2.668999  | -1.291217 |
| H           | 0.002100  | 8.379277 | 1.377910  | H           | -5.632761 | 2.464407  | 0.090085  |
| H           | 2.156433  | 1.401185 | 0.452334  | H           | -4.024566 | 5.033193  | 1.856519  |
| H           | 0.074815  | 0.041228 | 0.232960  | H           | -2.926360 | 4.058829  | 2.871660  |
| H           | -2.131969 | 1.171656 | -0.053851 | H           | -4.636524 | 3.602238  | 2.725339  |
| H           | -0.009466 | 5.660179 | -1.429812 | H           | -4.734289 | -0.687534 | -1.845486 |
|             |           |          |           | H           | -0.311657 | 4.950193  | -1.437595 |
|             |           |          |           | H           | 1.798755  | 3.788069  | -2.088966 |
|             |           |          |           | H           | 2.184640  | 1.420560  | -1.399306 |
|             |           |          |           | H           | -3.575477 | 0.182636  | 2.105822  |
| <b>IM18</b> |           |          |           |             |           |           |           |
| C           | -1.189857 | 1.639904 | -0.149942 |             |           |           |           |
| C           | -1.272950 | 3.023622 | -0.051148 |             |           |           |           |
| C           | -0.152083 | 3.827816 | 0.174011  |             |           |           |           |
| C           | 1.081945  | 3.182158 | 0.277936  |             |           |           |           |
| C           | 1.213131  | 1.801784 | 0.184403  |             |           |           |           |
| C           | 0.063971  | 1.039412 | -0.029429 |             |           |           |           |
| O           | -2.519945 | 3.638301 | -0.188054 |             |           |           |           |
| P           | -2.540539 | 5.296401 | 0.009735  |             |           |           |           |
| C           | -3.442074 | 5.858072 | -1.471558 |             |           |           |           |
| Ir          | -0.321059 | 5.836909 | 0.369827  |             |           |           |           |
| P           | 1.955811  | 5.607820 | 0.672045  |             |           |           |           |

|   |           |           |          |   |           |           |           |
|---|-----------|-----------|----------|---|-----------|-----------|-----------|
| H | -5.194754 | -3.015112 | 3.058005 | P | 2.154871  | 0.052113  | 0.988617  |
| H | -5.055735 | -2.401251 | 1.396130 | C | 3.356275  | -1.041586 | 0.138098  |
| H | -3.605453 | -2.894037 | 2.299155 | C | 2.886870  | 0.214268  | 2.659373  |
| H | -6.781948 | -0.327918 | 3.795997 | O | 2.600499  | 1.511062  | 0.280601  |
| H | -6.008507 | 1.232049  | 3.502946 | C | 1.542205  | 2.343785  | -0.094189 |
| H | -6.556202 | 0.243583  | 2.127429 | C | 1.822673  | 3.623786  | -0.562818 |
| H | -4.145888 | -1.150389 | 5.451943 | C | 0.748638  | 4.450234  | -0.897148 |
| H | -2.578627 | -1.078385 | 4.636616 | C | -0.570518 | 4.017139  | -0.751536 |
| H | -3.429136 | 0.413914  | 5.041328 | C | -0.790651 | 2.727426  | -0.278881 |
| H | -1.613764 | 1.479168  | 2.351349 | C | 0.246323  | 1.852081  | 0.037433  |

### TS20

|    |           |           |           |    |           |           |           |
|----|-----------|-----------|-----------|----|-----------|-----------|-----------|
| Ir | -0.093210 | -0.071090 | 0.407128  | H  | -2.973324 | -0.033290 | -1.633039 |
| H  | -0.052966 | 0.365542  | 1.903028  | O  | -0.126684 | -1.523184 | -1.391491 |
| P  | 2.214216  | -0.030255 | 0.482193  | C  | -0.148435 | -0.870663 | -2.583769 |
| C  | 3.278135  | -0.932291 | -0.701325 | O  | -0.610837 | 0.218289  | -2.731517 |
| C  | 3.063424  | -0.271505 | 2.082782  | H  | 0.317309  | -1.445608 | -3.399145 |
| O  | 2.627705  | 1.544321  | 0.104798  | H  | -0.450599 | -1.524441 | 1.531356  |
| C  | 1.560243  | 2.426077  | -0.074939 | Si | -0.289786 | -3.253760 | -1.194499 |
| C  | 1.831851  | 3.766064  | -0.327742 | C  | 1.059828  | -3.880712 | -0.069565 |
| C  | 0.755878  | 4.641122  | -0.476174 | C  | -0.118319 | -4.032747 | -2.901187 |
| C  | -0.559143 | 4.190706  | -0.359699 | C  | -2.000981 | -3.565153 | -0.513270 |
| C  | -0.774795 | 2.841119  | -0.105552 | C  | -3.463978 | 0.046340  | -0.663484 |
| C  | 0.265192  | 1.921698  | 0.023486  | H  | 3.047466  | -1.187599 | -0.897202 |
| O  | -2.083660 | 2.384831  | 0.046428  | H  | 4.347153  | -0.582725 | 0.153388  |
| P  | -2.252554 | 0.752569  | 0.354161  | H  | 2.349388  | 0.991910  | 3.202456  |
| C  | -3.242778 | 0.757761  | 1.889569  | H  | 3.945179  | 0.476962  | 2.599048  |
| H  | -2.972985 | 0.396141  | -1.911346 | H  | 2.767135  | -0.729081 | 3.196604  |
| O  | -0.234987 | -1.291668 | -1.514864 | H  | 3.392556  | -2.009698 | 0.640016  |
| C  | -0.549054 | -0.941661 | -2.757622 | H  | -4.330409 | 0.705469  | -0.752439 |
| O  | -0.770574 | 0.187289  | -3.110545 | H  | -3.786927 | -0.942350 | -0.332188 |
| H  | -0.594083 | -1.800517 | -3.448405 | H  | -4.177212 | 1.651404  | 1.750924  |
| H  | -0.459022 | -1.725225 | 0.737202  | H  | -2.700514 | 1.602519  | 2.747579  |
| Si | -0.290689 | -2.972621 | -0.534988 | H  | -3.604332 | 0.108291  | 2.448479  |
| C  | 0.382170  | -3.935792 | 0.983482  | H  | -1.405928 | 4.662607  | -0.993384 |
| C  | 0.761425  | -3.804414 | -1.893759 | H  | 0.942238  | 5.451510  | -1.265526 |
| C  | -2.105789 | -3.443427 | -0.740616 | H  | 2.846997  | 3.963590  | -0.654975 |
| C  | -3.451137 | 0.279487  | -0.938880 | H  | -0.230988 | -5.116937 | -2.795910 |
| H  | 2.860658  | -0.838538 | -1.703823 | H  | -0.885804 | -3.698173 | -3.604690 |
| H  | 4.286100  | -0.512272 | -0.687964 | H  | 0.861378  | -3.856143 | -3.354306 |
| H  | 2.585965  | 0.361519  | 2.830862  | H  | -2.153237 | -4.638281 | -0.358268 |
| H  | 4.121188  | -0.011686 | 2.003753  | H  | -2.121699 | -3.056035 | 0.444453  |
| H  | 2.961917  | -1.313645 | 2.393931  | H  | -2.776072 | -3.214058 | -1.199802 |
| H  | 3.323238  | -1.989662 | -0.431503 | H  | 0.907841  | -4.950465 | 0.109817  |
| H  | -4.334154 | 0.919970  | -0.884927 | H  | 2.050494  | -3.756063 | -0.512757 |
| H  | -3.745727 | -0.763169 | -0.803414 | H  | 1.027427  | -3.361562 | 0.889049  |
| H  | -4.142889 | 1.364167  | 1.768986  |    |           |           |           |
| H  | -2.635802 | 1.158942  | 2.701129  |    |           |           |           |
| H  | -3.520961 | -0.269129 | 2.137674  |    |           |           |           |
| H  | -1.399857 | 4.865293  | -0.462276 |    |           |           |           |
| H  | 0.944598  | 5.689314  | -0.677355 |    |           |           |           |
| H  | 2.856114  | 4.109017  | -0.403502 |    |           |           |           |
| H  | 0.812119  | -4.881978 | -1.709947 |    |           |           |           |
| H  | 0.370005  | -3.655356 | -2.903248 |    |           |           |           |
| H  | 1.789750  | -3.429835 | -1.889658 |    |           |           |           |
| H  | -2.182276 | -4.535004 | -0.781164 |    |           |           |           |
| H  | -2.708305 | -3.103718 | 0.105184  |    |           |           |           |
| H  | -2.546847 | -3.046399 | -1.658025 |    |           |           |           |
| H  | 0.399028  | -5.012706 | 0.780048  |    |           |           |           |
| H  | 1.406802  | -3.630798 | 1.220487  |    |           |           |           |
| H  | -0.224338 | -3.750307 | 1.873543  |    |           |           |           |

### IM20

|    |           |           |          |
|----|-----------|-----------|----------|
| Ir | -0.132356 | -0.057444 | 0.810342 |
| H  | -0.178392 | 0.524368  | 2.238023 |
